# Supplementary material for: Frequency of large volcanic eruptions over the past 200,000 years
Source: Copernicus journal article supplement (doi:10.5194/cp-2022-69), 2022-09-09
Supplement: Supplementary file 1 [file EDCsulfate FIC_inputfile.xlsx]

## Sheet: Data
Depth	Par_value	Sample_thickness	Layer_thickness	Acc_rate	Age
	Sulphate
EDC99 depth	ug/l	m	ma-1	kgm-2a-1	years
6.73597	74.1145	0.0639091	0.0616748	26.6112	33.1236
6.79988	91.014	0.0639091	0.0616748	26.6112	34.0728
6.86378	105.399	0.0639091	0.0616748	26.6112	35.1768
6.92769	83.5419	0.0759091	0.0616748	26.6112	36.1206
7.0036	82.7388	0.0639091	0.0616748	26.6112	37.376
7.06751	97.8226	0.0639091	0.0616748	26.6112	38.3155
7.13142	79.2821	0.0639091	0.0616748	26.6112	39.41
7.19533	93.0391	0.0739091	0.0616748	26.6112	40.3471
7.26924	103.339	0.0639091	0.0616748	26.6112	41.4394
7.33315	86.2654	0.0639091	0.0616748	26.6112	42.5313
7.39706	74.2193	0.0639091	0.0616748	26.6112	43.4672
7.53686	49.6034	0.0663	0.0616748	26.6112	45.6524
7.60316	95.2737	0.0663	0.0616748	26.6112	46.7468
7.66946	100.406	0.0783	0.0616748	26.6112	47.6862
7.74776	128.514	0.0663	0.0616748	26.6112	48.9413
7.81406	139.966	0.0663	0.0616748	26.6112	50.0423
7.88036	91.2933	0.0763	0.0616748	26.6112	51.1465
7.95666	75.9302	0.0663	0.0616748	26.6112	52.2544
8.02296	89.6522	0.0663	0.0616748	26.6112	53.3664
8.08926	158.402	0.0663	0.0616748	26.6112	54.3231
8.15556	289.408	0.0663	0.0616748	26.6112	55.4439
8.22186	121.635	0.0663	0.0616748	26.6112	56.5701
8.28816	108.088	0.0783	0.0634664	26.3676	57.54
8.36646	123.905	0.0663	0.0634664	26.3676	58.8402
8.43276	115.455	0.0743	0.0634664	26.3676	59.9841
8.50706	89.1285	0.0663	0.0634664	26.3676	61.1336
8.57336	80.6788	0.0663	0.0634664	26.3676	62.2886
8.67758	78.5489	0.072	0.0634664	26.3676	63.9477
8.74958	85.2179	0.065	0.0634664	26.3676	65.1153
8.81457	80.1899	0.065	0.0634664	26.3676	66.2878
8.87957	71.7402	0.075	0.0634664	26.3676	67.2965
8.95457	78.095	0.065	0.0634664	26.3676	68.6466
9.01957	74.9874	0.065	0.0634664	26.3676	69.663
9.08457	91.014	0.065	0.0634664	26.3676	70.8526
9.14957	82.2151	0.065	0.0634664	26.3676	71.8756
9.21457	68.8073	0.065	0.0634664	26.3676	73.0726
9.27957	83.5768	0.07	0.0634664	26.3676	74.1016
9.34957	138.849	0.065	0.0634664	26.3676	75.3055
9.41457	134.101	0.07	0.0634664	26.3676	76.5127
9.48457	98.7304	0.065	0.0634664	26.3676	77.7231
9.54957	83.3324	0.065	0.0634664	26.3676	78.7631
9.61457	74.2193	0.065	0.0634664	26.3676	79.9791
9.67957	75.4064	0.0564625	0.0634664	26.3676	81.0236
9.73604	74.8827	0.0633	0.0634664	26.3676	82.07
9.79934	63.9888	0.0633	0.0634664	26.3676	83.1182
9.86264	61.6494	0.0633	0.0634664	26.3676	84.3432
9.92594	64.8268	0.0633	0.0589503	25.0532	85.3949
9.98924	63.7793	0.0633	0.0589503	25.0532	86.4481
10.0525	73.067	0.0633	0.0589503	25.0532	87.6787
10.1158	71.426	0.0633	0.0589503	25.0532	88.7351
10.1791	77.8506	0.0633	0.0589503	25.0532	89.793
10.2424	69.1564	0.0633	0.0589503	25.0532	91.029
10.3057	64.3729	0.0633	0.0589503	25.0532	92.09
10.369	80.2249	0.0633	0.0589503	25.0532	93.1524
10.4323	102.955	0.0633	0.0589503	25.0532	94.3937
10.4956	81.5168	0.0633	0.0589503	25.0532	95.4592
10.5589	96.2514	0.0683	0.0589503	25.0532	96.5261
10.6272	110.043	0.0633	0.0589503	25.0532	97.7726
10.6905	109.415	0.0633	0.0589503	25.0532	99.021
10.7538	86.7193	0.0827331	0.0589503	25.0532	100.093
10.8366	74.4637	0.0655215	0.0589503	25.0532	101.523
10.9021	75.4763	0.0655215	0.0589503	25.0532	102.777
10.9676	73.5559	0.0715215	0.0589503	25.0532	103.854
11.0391	174.324	0.0655215	0.0589503	25.0532	105.111
11.1047	110.183	0.0655215	0.0589503	25.0532	106.37
11.1702	93.2835	0.0655215	0.0589503	25.0532	107.631
11.2357	119.75	0.0655215	0.0589503	25.0532	108.713
11.3012	130.609	0.0655215	0.0589503	25.0532	109.978
11.3667	118.353	0.0755215	0.0589503	25.0532	111.063
11.4423	83.4372	0.0655215	0.0589503	25.0532	112.511
11.5078	88.9888	0.0655215	0.0589503	25.0532	113.599
11.5733	96.2514	0.0655215	0.0560028	24.2094	114.87
11.6388	77.676	0.0655215	0.0560028	24.2094	115.961
11.7043	91.1885	0.0655215	0.0560028	24.2094	117.235
11.7699	143.109	0.0655215	0.0560028	24.2094	118.329
11.8354	93.9469	0.0655215	0.0560028	24.2094	119.606
11.9374	96.2863	0.06775	0.0560028	24.2094	121.434
12.0052	148.102	0.07775	0.0560028	24.2094	122.716
12.0829	550.4	0.06775	0.0560028	24.2094	124.183
12.1507	605.7	0.06775	0.0560028	24.2094	125.469
12.2184	235.288	0.06775	0.0560028	24.2094	126.573
12.2862	138.116	0.06775	0.0560028	24.2094	127.862
12.3539	118.493	0.06775	0.0560028	24.2094	129.154
12.4217	128.444	0.0588437	0.0560028	24.2094	130.447
12.4805	270.5	0.0725	0.0560028	24.2094	131.557
12.553	160.288	0.0713	0.0560028	24.2094	132.854
12.6243	102.92	0.0702	0.0560028	24.2094	134.153
12.6945	92.9344	0.0695	0.0560028	24.2094	135.454
12.764	91.5028	0.0592	0.0560028	24.2094	136.758
12.8232	69.7849	0.0688	0.0560028	24.2094	137.877
12.892	80.8534	0.0688	0.0560028	24.2094	139.184
12.9608	77.3268	0.0688	0.0560028	24.2094	140.493
13.0793	70.9372	0.0696	0.0560028	24.2094	142.555
13.1489	80.7486	0.0699	0.0560028	24.2094	143.87
13.2188	92.4106	0.06	0.0541126	24.4393	145.187
13.2788	82.0405	0.0703	0.0541126	24.4393	146.318
13.3491	87.7318	0.0703	0.0541126	24.4393	147.639
13.4194	92.7598	0.0603	0.0541126	24.4393	148.963
13.4797	70.7975	0.0703	0.0541126	24.4393	150.098
13.55	80.3296	0.0702	0.0541126	24.4393	151.614
13.6202	76.1746	0.0701	0.0541126	24.4393	152.942
13.6903	95.7975	0.0701	0.0541126	24.4393	154.271
13.7604	85.8115	0.06	0.0541126	24.4393	155.602
13.8204	82.1103	0.0699	0.0541126	24.4393	156.743
13.8903	81.3771	0.0699	0.0541126	24.4393	158.074
13.9602	80.3296	0.0599	0.0541126	24.4393	159.407
14.0201	73.6955	0.0599	0.0541126	24.4393	160.55
14.13	53.8282	0.07	0.0541126	24.4393	162.645
14.2	65.8394	0.06	0.0541126	24.4393	163.978
14.26	78.3045	0.07	0.0541126	24.4393	165.121
14.33	88.4302	0.07	0.0541126	24.4393	166.454
14.4	78.5838	0.06	0.0541126	24.4393	167.787
14.46	88.3603	0.06	0.0541126	24.4393	168.929
14.52	77.1173	0.07	0.0541126	24.4393	170.07
14.59	93.074	0.06	0.0541126	24.4393	171.401
14.65	89.0237	0.0701	0.0541126	24.4393	172.54
14.7201	81.831	0.06	0.0541126	24.4393	173.869
14.7801	121.775	0.07	0.0541126	24.4393	175.007
14.8501	80.574	0.06	0.0526585	24.5417	176.333
14.9101	65.9791	0.06	0.0526585	24.5417	177.468
14.9701	76.2444	0.07	0.0526585	24.5417	178.603
15.0401	78.4441	0.06	0.0526585	24.5417	179.925
15.1001	138.256	0.07	0.0526585	24.5417	181.057
15.1701	173.556	0.05	0.0526585	24.5417	182.377
15.2201	75.2668	0.07	0.0526585	24.5417	183.32
15.2901	76.5587	0.06	0.0526585	24.5417	184.639
15.3501	85.8464	0.06	0.0526585	24.5417	185.769
15.4101	81.0628	0.07	0.0526585	24.5417	186.899
15.4801	91.5726	0.06	0.0526585	24.5417	188.217
15.5401	65.8045	0.07	0.0526585	24.5417	189.347
15.6101	52.7458	0.06	0.0526585	24.5417	190.666
15.6701	68.6676	0.07	0.0526585	24.5417	191.797
15.7401	66.0838	0.06	0.0526585	24.5417	193.116
15.8001	70.6229	0.06	0.0526585	24.5417	194.248
15.8601	85.0433	0.07	0.0526585	24.5417	195.381
15.9301	71.5656	0.06	0.0526585	24.5417	196.703
15.9901	47.3338	0.07	0.0526585	24.5417	197.838
16.0601	63.2207	0.06	0.0526585	24.5417	199.163
16.1201	72.1592	0.06	0.0526585	24.5417	200.3
16.1801	73.5559	0.07	0.0526585	24.5417	201.438
16.2501	62.243	0.07	0.0526585	24.5417	202.768
16.3601	93.9818	0.06	0.0526585	24.5417	204.863
16.4201	82.3547	0.06	0.0526585	24.5417	206.009
16.4801	80.5042	0.06	0.0526585	24.5417	207.156
16.5401	81.6564	0.06	0.0528744	24.7508	208.306
16.6001	79.2472	0.05	0.0528744	24.7508	209.457
16.6501	75.8603	0.06	0.0528744	24.7508	210.418
16.7101	116.642	0.06	0.0528744	24.7508	211.574
16.7701	74.4986	0.06	0.0528744	24.7508	212.732
16.8301	76.1746	0.05	0.0528744	24.7508	213.892
16.8801	78.7235	0.06	0.0528744	24.7508	214.86
16.9401	64.7221	0.06	0.0528744	24.7508	216.024
17.0001	56.7612	0.06	0.0528744	24.7508	217.19
17.0601	52.9553	0.06	0.0528744	24.7508	218.359
17.1201	54.9804	0.05	0.0528744	24.7508	219.529
17.1701	86.7193	0.06	0.0528744	24.7508	220.507
17.2301	80.4693	0.06	0.0528744	24.7508	221.681
17.2901	130.12	0.06	0.0528744	24.7508	222.858
17.3501	103.235	0.06	0.0528744	24.7508	224.038
17.4701	82.5642	0.06	0.0528744	24.7508	226.403
17.5301	79.7709	0.06	0.0528744	24.7508	227.589
17.5901	70.6229	0.07	0.0528744	24.7508	228.777
17.6601	118.214	0.05	0.0528744	24.7508	230.166
17.7101	106.377	0.06	0.0528744	24.7508	231.16
17.7701	97.8575	0.06	0.0528744	24.7508	232.355
17.8301	81.6913	0.06	0.0528744	24.7508	233.552
17.8901	74.9874	0.06	0.0528744	24.7508	234.752
17.9501	76.4888	0.06	0.0528744	24.7508	235.953
18.0101	53.3045	0.06	0.0528744	24.7508	237.157
18.0701	87.662	0.06	0.0528744	24.7508	238.364
18.1301	90.0014	0.06	0.0528744	24.7508	239.573
18.1901	79.2123	0.06	0.0508678	24.2723	240.784
18.2501	95.3785	0.05	0.0508678	24.2723	241.997
18.3001	96.1816	0.06	0.0508678	24.2723	243.01
18.3601	153.968	0.06	0.0508678	24.2723	244.227
18.4201	184.624	0.06	0.0508678	24.2723	245.447
18.4801	147.927	0.07	0.0508678	24.2723	246.67
18.5501	55.8184	0.06	0.0508678	24.2723	248.099
18.6101	59.6243	0.06	0.0508678	24.2723	249.327
18.6701	66.6774	0.06	0.0508678	24.2723	250.557
18.7301	50.8254	0.06	0.0508678	24.2723	251.789
18.7901	66.9218	0.06	0.0508678	24.2723	253.024
18.8501	63.3603	0.06	0.0508678	24.2723	254.262
18.9101	69.2612	0.06	0.0508678	24.2723	255.502
18.9701	78.5489	0.05	0.0508678	24.2723	256.744
19.0201	77.8156	0.0601	0.0508678	24.2723	257.782
19.0802	64.8268	0.07	0.0508678	24.2723	259.029
19.1502	61.7193	0.06	0.0508678	24.2723	260.487
19.2102	62.3128	0.06	0.0508678	24.2723	261.74
19.2702	59.4148	0.06	0.0508678	24.2723	262.995
19.3302	67.6899	0.06	0.0508678	24.2723	264.253
19.3902	96.3212	0.06	0.0508678	24.2723	265.514
19.4502	117.83	0.06	0.0508678	24.2723	266.777
19.5102	141.817	0.06	0.0508678	24.2723	268.043
19.5702	109.869	0.06	0.0508678	24.2723	269.312
19.6702	64.4777	0.07	0.0508678	24.2723	271.433
19.7402	74.5684	0.06	0.0508678	24.2723	272.922
19.8002	70.6578	0.05	0.0482104	23.9225	274.201
19.8502	94.0517	0.06	0.0482104	23.9225	275.269
19.9102	103.654	0.06	0.0482104	23.9225	276.553
19.9702	94.7151	0.06	0.0482104	23.9225	277.84
20.0302	98.8003	0.06	0.0482104	23.9225	279.13
20.0902	98.2067	0.06	0.0482104	23.9225	280.421
20.1502	91.4679	0.06	0.0482104	23.9225	281.715
20.2102	92.9344	0.06	0.0482104	23.9225	283.011
20.2702	99.8827	0.05	0.0482104	23.9225	284.309
20.3202	107.075	0.06	0.0482104	23.9225	285.393
20.3802	91.398	0.06	0.0482104	23.9225	286.694
20.4402	86.9637	0.06	0.0482104	23.9225	287.997
20.5002	62.1732	0.06	0.0482104	23.9225	289.302
20.5602	65.6997	0.06	0.0482104	23.9225	290.609
20.6202	78.4092	0.06	0.0482104	23.9225	291.917
20.6802	55.6089	0.06	0.0482104	23.9225	293.226
20.7402	57.9483	0.06	0.0482104	23.9225	294.536
20.8002	56.412	0.07	0.0482104	23.9225	295.848
20.8702	64.7221	0.06	0.0482104	23.9225	297.379
20.9302	67.236	0.06	0.0482104	23.9225	298.692
20.9902	103.933	0.07	0.0482104	23.9225	300.006
21.0602	138.884	0.07	0.0482104	23.9225	301.54
21.1302	87.7668	0.06	0.0482104	23.9225	303.075
21.1902	88.7444	0.07	0.0482104	23.9225	304.391
21.2602	68.5279	0.06	0.0482104	23.9225	305.926
21.3202	79.5265	0.07	0.0482104	23.9225	307.242
21.3902	61.7193	0.06	0.0482104	23.9225	308.778
21.4502	63.1858	0.07	0.04597	23.7623	310.094
21.5202	67.8296	0.06	0.04597	23.7623	311.629
21.5802	66.014	0.07	0.04597	23.7623	312.945
21.6502	86.7193	0.06	0.04597	23.7623	314.48
21.7102	78.514	0.06	0.04597	23.7623	315.797
21.7702	87.7318	0.06	0.04597	23.7623	317.113
21.8702	105.888	0.06	0.04597	23.7623	319.308
21.9302	140.141	0.07	0.04597	23.7623	320.626
22.0002	174.638	0.07	0.04597	23.7623	322.165
22.0702	120.693	0.06	0.04597	23.7623	323.705
22.1302	94.5405	0.07	0.04597	23.7623	325.026
22.2002	78.933	0.06	0.04597	23.7623	326.569
22.2602	93.1089	0.07	0.04597	23.7623	327.893
22.3302	74.1494	0.06	0.04597	23.7623	329.439
22.3902	78.1299	0.07	0.04597	23.7623	330.766
22.4602	80.2947	0.06	0.04597	23.7623	332.317
22.5202	83.8911	0.06	0.04597	23.7623	333.648
22.5802	82.5992	0.07	0.04597	23.7623	334.981
22.6502	83.0531	0.06	0.04597	23.7623	336.539
22.7102	60.1131	0.06	0.04597	23.7623	337.877
22.7702	100.686	0.07	0.04597	23.7623	339.218
22.8402	99.6732	0.09	0.04597	23.7623	340.785
22.9302	102.257	0.07	0.04597	23.7623	342.805
23.0002	193.633	0.07	0.04597	23.7623	344.38
23.0702	186.335	0.07	0.04597	23.7623	345.96
23.1402	169.506	0.06	0.0451511	23.1932	347.544
23.2002	172.508	0.07	0.0451511	23.1932	348.905
23.2702	113.011	0.07	0.0451511	23.1932	350.496
23.3402	88.8841	0.07	0.0451511	23.1932	352.092
23.4102	122.02	0.0701	0.0451511	23.1932	353.692
23.4803	72.2291	0.07	0.0451511	23.1932	355.296
23.5503	128.968	0.07	0.0451511	23.1932	356.903
23.6203	94.2612	0.07	0.0451511	23.1932	358.513
23.6903	87.662	0.07	0.0451511	23.1932	360.128
23.7603	93.4581	0.07	0.0451511	23.1932	361.745
23.8303	80.7486	0.06	0.0451511	23.1932	363.365
23.8903	80.6089	0.07	0.0451511	23.1932	364.757
23.9603	96.7402	0.07	0.0451511	23.1932	366.383
24.0803	123.724	0.07	0.0451511	23.1932	369.177
24.1503	102.959	0.07	0.0451511	23.1932	370.81
24.2203	89.0418	0.07	0.0451511	23.1932	372.445
24.2903	88.0073	0.06	0.0451511	23.1932	374.083
24.3503	80.1495	0.07	0.0451511	23.1932	375.489
24.4203	107.716	0.07	0.0451511	23.1932	377.13
24.4903	109.458	0.07	0.0451511	23.1932	378.774
24.5603	102.307	0.07	0.0451511	23.1932	380.419
24.6303	104.995	0.07	0.0451511	23.1932	382.066
24.7003	99.4888	0.06	0.0451511	23.1932	383.715
24.7603	93.2097	0.07	0.0431316	23.3223	385.129
24.8303	79.6066	0.08	0.0431316	23.3223	386.78
24.9103	66.2689	0.06	0.0431316	23.3223	388.668
24.9703	89.414	0.07	0.0431316	23.3223	390.084
25.0403	102.837	0.09	0.0431316	23.3223	391.738
25.1303	128.619	0.07	0.0431316	23.3223	393.865
25.2003	89.662	0.07	0.0431316	23.3223	395.519
25.2703	76.3005	0.07	0.0431316	23.3223	397.173
25.3403	76.9292	0.07	0.0431316	23.3223	398.828
25.4103	92.1385	0.06	0.0431316	23.3223	400.482
25.4703	95.8003	0.07	0.0431316	23.3223	401.899
25.5403	88.4626	0.07	0.0431316	23.3223	403.552
25.6103	75.7554	0.07	0.0431316	23.3223	405.205
25.6803	113.458	0.07	0.0431316	23.3223	406.856
25.7503	86.4742	0.07	0.0431316	23.3223	408.506
25.8203	104.303	0.07	0.0431316	23.3223	410.155
25.8903	81.9847	0.07	0.0431316	23.3223	411.802
25.9603	94.6498	0.07	0.0431316	23.3223	413.447
26.0303	69.5685	0.06	0.0431316	23.3223	415.091
26.0903	68.4699	0.08	0.0431316	23.3223	416.498
26.1703	65.4209	0.08	0.0431316	23.3223	418.372
26.2903	76.0909	0.07	0.0431316	23.3223	421.176
26.3603	61.1266	0.07	0.0431316	23.3223	422.808
26.4303	80.1077	0.07	0.0424754	24.1163	424.437
26.5003	112.893	0.07	0.0424754	24.1163	426.063
26.5703	69.7796	0.07	0.0424754	24.1163	427.686
26.6403	76.3424	0.07	0.0424754	24.1163	429.307
26.7103	67.1161	0.07	0.0424754	24.1163	430.925
26.7803	61.1266	0.07	0.0424754	24.1163	432.541
26.8503	59.5911	0.07	0.0424754	24.1163	434.155
26.9203	90.5295	0.07	0.0424754	24.1163	435.767
26.9903	90.4469	0.08	0.0424754	24.1163	437.378
27.0703	76.0489	0.07	0.0424754	24.1163	439.217
27.1403	86.8059	0.07	0.0424754	24.1163	440.825
27.2103	72.604	0.07	0.0424754	24.1163	442.431
27.2803	118.364	0.05	0.0424754	24.1163	444.037
27.3303	70.6236	0.07	0.0424754	24.1163	445.184
27.4003	97.9332	0.07	0.0424754	24.1163	446.789
27.5103	95.8003	0.07	0.0424754	24.1163	449.31
27.5803	75.8812	0.06	0.0424754	24.1163	450.915
27.6403	97.4004	0.0701	0.0424754	24.1163	452.29
27.7104	80.4834	0.07	0.0424754	24.1163	453.895
27.7804	54.4112	0.07	0.0424754	24.1163	455.501
27.8504	68.5122	0.07	0.0424754	24.1163	457.107
27.9204	101.042	0.07	0.0424754	24.1163	458.715
27.9904	99.6115	0.07	0.0424754	24.1163	460.323
28.0604	105.442	0.06	0.0434622	24.2675	461.933
28.1204	92.7979	0.07	0.0434622	24.2675	463.314
28.1904	107.513	0.07	0.0434622	24.2675	464.927
28.2604	94.8964	0.07	0.0434622	24.2675	466.541
28.3304	82.6928	0.07	0.0434622	24.2675	468.157
28.4404	76.6358	0.07	0.0434622	24.2675	470.7
28.5104	128.659	0.06	0.0434622	24.2675	472.321
28.5704	143.276	0.07	0.0434622	24.2675	473.711
28.6404	150.602	0.06	0.0434622	24.2675	475.335
28.7004	182.403	0.09	0.0434622	24.2675	476.729
28.7904	100.184	0.06	0.0434622	24.2675	478.822
28.8504	96.2929	0.07	0.0434622	24.2675	480.219
28.9204	98.7523	0.07	0.0434622	24.2675	481.852
29.0304	83.6084	0.07	0.0434622	24.2675	484.421
29.1004	91.0662	0.07	0.0434622	24.2675	486.059
29.1704	88.0901	0.07	0.0434622	24.2675	487.7
29.2404	92.8803	0.06	0.0434622	24.2675	489.343
29.3004	108.567	0.07	0.0434622	24.2675	490.753
29.3704	96.2518	0.07	0.0434622	24.2675	492.4
29.4404	134.437	0.07	0.0434622	24.2675	494.05
29.5104	335.115	0.06	0.0434622	24.2675	495.703
29.5704	398.584	0.07	0.0434622	24.2675	497.121
29.6404	234.467	0.07	0.0434622	24.2675	498.779
29.7104	108.446	0.07	0.0428583	24.0325	500.439
29.7804	156.95	0.07	0.0428583	24.0325	502.103
29.8504	140.417	0.06	0.0428583	24.0325	503.768
29.9104	91.355	0.07	0.0428583	24.0325	505.198
29.9804	83.442	0.07	0.0428583	24.0325	506.869
30.0904	101.573	0.06	0.0428583	24.0325	509.498
30.1504	105.808	0.07	0.0428583	24.0325	510.935
30.2204	103.163	0.06	0.0428583	24.0325	512.613
30.2804	107.392	0.07	0.0428583	24.0325	514.052
30.3504	68.6813	0.06	0.0428583	24.0325	515.733
30.4104	84.6893	0.07	0.0428583	24.0325	517.176
30.4804	95.0608	0.06	0.0428583	24.0325	518.86
30.5404	90.4469	0.07	0.0428583	24.0325	520.304
30.6104	102.715	0.07	0.0428583	24.0325	521.991
30.6804	87.3861	0.07	0.0428583	24.0325	523.678
30.7504	93.9506	0.06	0.0428583	24.0325	525.367
30.8104	105.93	0.07	0.0428583	24.0325	526.814
30.8804	111.642	0.06	0.0428583	24.0325	528.504
30.9404	77.2224	0.07	0.0428583	24.0325	529.953
31.0104	105.564	0.07	0.0428583	24.0325	531.644
31.0804	114.747	0.06	0.0428583	24.0325	533.336
31.1404	105.849	0.07	0.0428583	24.0325	534.785
31.2104	101.736	0.07	0.0428583	24.0325	536.477
31.2804	76.4263	0.07	0.0428583	24.0325	538.169
31.3504	79.6901	0.06	0.0416057	24.2709	539.86
31.4104	86.7644	0.07	0.0416057	24.2709	541.31
31.4804	82.0264	0.06	0.0416057	24.2709	543
31.5404	78.1015	0.07	0.0416057	24.2709	544.449
31.6104	79.4812	0.06	0.0416057	24.2709	546.139
31.6704	72.9827	0.06	0.0416057	24.2709	547.588
31.7804	62.617	0.07	0.0416057	24.2709	550.242
31.8504	64.02	0.07	0.0416057	24.2709	551.93
31.9204	54.4541	0.07	0.0416057	24.2709	553.617
31.9904	73.3192	0.07	0.0416057	24.2709	555.304
32.0604	60.6151	0.07	0.0416057	24.2709	556.99
32.1304	89.7033	0.07	0.0416057	24.2709	558.675
32.2004	98.7932	0.0701	0.0416057	24.2709	560.359
32.2705	84.9385	0.07	0.0416057	24.2709	562.042
32.3405	85.6444	0.09	0.0416057	24.2709	563.724
32.4305	121.648	0.06	0.0416057	24.2709	565.885
32.4905	118.885	0.07	0.0416057	24.2709	567.325
32.5605	83.5252	0.07	0.0416057	24.2709	569.003
32.6305	102.511	0.07	0.0416057	24.2709	570.68
32.7005	90.0339	0.07	0.0416057	24.2709	572.356
32.7705	96.1287	0.07	0.0416057	24.2709	574.031
32.8805	102.552	0.07	0.0416057	24.2709	576.659
32.9505	93.6625	0.06	0.0416057	24.2709	578.33
33.0105	97.0314	0.07	0.0416015	25.1651	579.76
33.0805	68.2162	0.06	0.0416015	25.1651	581.428
33.1405	81.4012	0.07	0.0416015	25.1651	582.856
33.2105	93.8683	0.06	0.0416015	25.1651	584.52
33.2705	89.1245	0.07	0.0416015	25.1651	585.945
33.3405	94.4442	0.07	0.0416015	25.1651	587.606
33.4105	112.651	0.06	0.0416015	25.1651	589.264
33.4705	103.204	0.07	0.0416015	25.1651	590.684
33.5405	110.996	0.07	0.0416015	25.1651	592.338
33.6105	106.052	0.06	0.0416015	25.1651	593.989
33.6705	75.5456	0.07	0.0416015	25.1651	595.402
33.7405	63.8076	0.07	0.0416015	25.1651	597.049
33.8105	101.981	0.06	0.0416015	25.1651	598.692
33.8705	88.9591	0.08	0.0416015	25.1651	600.099
33.9505	104.059	0.07	0.0416015	25.1651	601.97
34.0205	84.6893	0.06	0.0416015	25.1651	603.604
34.0805	85.1877	0.07	0.0416015	25.1651	605.002
34.1505	65.8026	0.07	0.0416015	25.1651	606.63
34.2205	66.6078	0.07	0.0416015	25.1651	608.254
34.2905	135.423	0.07	0.0416015	25.1651	609.875
34.3605	211.356	0.06	0.0416015	25.1651	611.491
34.4205	175.19	0.07	0.0416015	25.1651	612.874
34.4905	114.667	0.07	0.0416015	25.1651	614.483
34.5605	113.982	0.07	0.0416015	25.1651	616.089
34.6305	118.204	0.07	0.0416015	25.1651	617.689
34.7005	114.022	0.07	0.0427196	26.0589	619.286
34.7705	83.8163	0.07	0.0427196	26.0589	620.878
34.8405	105.158	0.07	0.0427196	26.0589	622.468
34.9105	80.9424	0.07	0.0427196	26.0589	624.054
34.9805	93.9506	0.07	0.0427196	26.0589	625.638
35.0805	128.341	0.06	0.0427196	26.0589	627.897
35.1405	78.7289	0.07	0.0427196	26.0589	629.252
35.2105	90.3643	0.06	0.0427196	26.0589	630.832
35.2705	62.7446	0.07	0.0427196	26.0589	632.187
35.3405	72.3935	0.06	0.0427196	26.0589	633.768
35.4005	54.5829	0.06	0.0427196	26.0589	635.123
35.4605	91.52	0.07	0.0427196	26.0589	636.48
35.5305	115.351	0.06	0.0427196	26.0589	638.066
35.5905	88.3385	0.07	0.0427196	26.0589	639.426
35.6605	106.296	0.07	0.0427196	26.0589	641.017
35.7305	89.0005	0.07	0.0427196	26.0589	642.611
35.8005	75.5036	0.06	0.0427196	26.0589	644.21
35.8605	88.1729	0.06	0.0427196	26.0589	645.584
35.9205	111.561	0.07	0.0427196	26.0589	646.962
35.9905	105.483	0.06	0.0427196	26.0589	648.575
36.0505	91.0662	0.06	0.0427196	26.0589	649.963
36.1505	114.425	0.07	0.0427196	26.0589	652.287
36.2205	88.2971	0.07	0.0427196	26.0589	653.923
36.2905	79.3141	0.06	0.0427196	26.0589	655.567
36.3505	80.0242	0.07	0.0438166	24.6476	656.984
36.4205	94.732	0.07	0.0438166	24.6476	658.644
36.4905	117.039	0.07	0.0438166	24.6476	660.313
36.5605	144.175	0.07	0.0438166	24.6476	661.991
36.6305	152.696	0.06	0.0438166	24.6476	663.677
36.6905	211.759	0.07	0.0438166	24.6476	665.128
36.7605	257.484	0.07	0.0438166	24.6476	666.828
36.8305	133.766	0.07	0.0438166	24.6476	668.536
36.9005	120.287	0.07	0.0438166	24.6476	670.251
36.9705	132.027	0.0701	0.0438166	24.6476	671.974
37.0406	160.493	0.0699	0.0438166	24.6476	673.704
37.1105	133.647	0.06	0.0438166	24.6476	675.44
37.1705	102.919	0.07	0.0438166	24.6476	676.934
37.2405	78.3107	0.0701	0.0438166	24.6476	678.683
37.3106	90.4882	0.07	0.0438166	24.6476	680.438
37.3806	213.588	0.06	0.0438166	24.6476	682.199
37.4406	304.201	0.07	0.0438166	24.6476	683.713
37.5106	205.813	0.07	0.0438166	24.6476	685.485
37.5806	103.448	0.07	0.0438166	24.6476	687.263
37.6506	85.5614	0.07	0.0438166	24.6476	689.046
37.7206	68.5968	0.07	0.0438166	24.6476	690.834
37.7906	204.413	0.06	0.0438166	24.6476	692.627
37.8506	327.875	0.07	0.0438166	24.6476	694.168
37.9206	637.114	0.07	0.0438166	24.6476	695.97
37.9906	516.428	0.07	0.0403019	23.4038	697.777
38.0606	154.052	0.07	0.0403019	23.4038	699.588
38.1306	110.349	0.07	0.0403019	23.4038	701.403
38.2006	94.074	0.07	0.0403019	23.4038	703.222
38.2706	91.2312	0.06	0.0403019	23.4038	705.045
38.3306	118.083	0.06	0.0403019	23.4038	706.61
38.3906	114.828	0.07	0.0403019	23.4038	708.179
38.4606	104.67	0.06	0.0403019	23.4038	710.012
38.5206	77.8085	0.06	0.0403019	23.4038	711.586
38.5806	76.0909	0.07	0.0403019	23.4038	713.162
38.6506	103.489	0.06	0.0403019	23.4038	715.004
38.7106	116.356	0.06	0.0403019	23.4038	716.586
38.7706	111.359	0.07	0.0403019	23.4038	718.169
38.8406	66.4807	0.06	0.0403019	23.4038	720.019
38.9006	106.945	0.06	0.0403019	23.4038	721.608
38.9606	153.974	0.07	0.0403019	23.4038	723.198
39.0306	336.886	0.06	0.0403019	23.4038	725.055
39.0906	319.328	0.08	0.0403019	23.4038	726.649
39.1706	132.936	0.06	0.0403019	23.4038	728.778
39.2306	104.181	0.07	0.0403019	23.4038	730.375
39.3006	67.2854	0.06	0.0403019	23.4038	732.242
39.3606	66.6078	0.07	0.0403019	23.4038	733.843
39.4306	87.3446	0.06	0.0403019	23.4038	735.712
39.4906	81.8597	0.07	0.0403019	23.4038	737.316
39.5606	82.8593	0.06	0.0403019	23.4038	739.189
39.6206	96.7442	0.07	0.0379171	23.4619	740.796
39.6906	109.175	0.06	0.0379171	23.4619	742.671
39.7506	101.042	0.06	0.0379171	23.4619	744.279
39.8106	94.7731	0.07	0.0379171	23.4619	745.888
39.8806	94.1152	0.06	0.0379171	23.4619	747.765
39.9406	100.429	0.06	0.0379171	23.4619	749.374
40.0006	93.2509	0.07	0.0379171	23.4619	750.982
40.0706	81.2344	0.06	0.0379171	23.4619	752.858
40.1306	71.5933	0.07	0.0379171	23.4619	754.466
40.2006	72.4356	0.06	0.0379171	23.4619	756.34
40.2606	95.9645	0.07	0.0379171	23.4619	757.945
40.3306	95.7181	0.06	0.0379171	23.4619	759.816
40.3906	95.5538	0.06	0.0379171	23.4619	761.418
40.4506	88.6695	0.09	0.0379171	23.4619	763.018
40.5406	157.104	0.06	0.0379171	23.4619	765.413
40.6006	226.842	0.06	0.0379171	23.4619	767.008
40.6606	176.818	0.06	0.0379171	23.4619	768.599
40.7206	169.146	0.06	0.0379171	23.4619	770.188
40.7806	120.448	0.06	0.0379171	23.4619	771.773
40.8406	110.308	0.06	0.0379171	23.4619	773.355
40.9006	71.846	0.06	0.0379171	23.4619	774.934
40.9606	109.944	0.06	0.0379171	23.4619	776.509
41.0206	127.984	0.06	0.0379171	23.4619	778.08
41.0806	94.6087	0.06	0.0379171	23.4619	779.646
41.1406	80.4417	0.06	0.0379171	23.4619	781.208
41.2006	100.715	0.06	0.0379171	23.4619	782.766
41.2606	136.526	0.07	0.0376712	25.4512	784.318
41.3306	310.785	0.06	0.0376712	25.4512	786.123
41.3906	250.654	0.06	0.0376712	25.4512	787.665
41.4506	149.087	0.06	0.0376712	25.4512	789.202
41.5106	93.3744	0.06	0.0376712	25.4512	790.733
41.5706	62.617	0.06	0.0376712	25.4512	792.26
41.6306	64.5297	0.06	0.0376712	25.4512	793.781
41.6906	77.1386	0.06	0.0376712	25.4512	795.297
41.7506	69.653	0.06	0.0376712	25.4512	796.809
41.8106	105.117	0.06	0.0376712	25.4512	798.315
41.8706	96.9083	0.06	0.0376712	25.4512	799.816
41.9306	127.546	0.07	0.0376712	25.4512	801.312
42.0006	125.359	0.06	0.0376712	25.4512	803.051
42.0606	106.702	0.06	0.0376712	25.4512	804.536
42.1206	105.442	0.06	0.0376712	25.4512	806.016
42.1806	118.484	0.0601	0.0376712	25.4512	807.491
42.2407	93.5802	0.06	0.0376712	25.4512	808.961
42.3007	130.166	0.06	0.0376712	25.4512	810.426
42.3607	121.048	0.07	0.0376712	25.4512	811.886
42.4307	112.006	0.06	0.0376712	25.4512	813.583
42.4907	98.4247	0.06	0.0376712	25.4512	815.032
42.5507	58.8224	0.06	0.0376712	25.4512	816.476
42.6107	89.786	0.06	0.0376712	25.4512	817.915
42.6707	87.1375	0.06	0.0376712	25.4512	819.348
42.7307	74.8321	0.06	0.0376712	25.4512	820.777
42.7907	94.6909	0.06	0.0376712	25.4512	822.201
42.8507	85.8104	0.06	0.0376712	25.4512	823.62
42.9107	75.7973	0.06	0.0405027	27.5948	825.033
42.9707	82.3596	0.06	0.0405027	27.5948	826.442
43.0307	105.483	0.06	0.0405027	27.5948	827.846
43.0907	120.247	0.06	0.0405027	27.5948	829.246
43.1507	91.3137	0.06	0.0405027	27.5948	830.642
43.2107	83.8995	0.06	0.0405027	27.5948	832.035
43.2707	75.6295	0.06	0.0405027	27.5948	833.425
43.3307	82.4013	0.06	0.0405027	27.5948	834.811
43.3907	97.4824	0.06	0.0405027	27.5948	836.196
43.4507	83.9411	0.07	0.0405027	27.5948	837.579
43.5207	89.4966	0.06	0.0405027	27.5948	839.19
43.5807	93.9095	0.06	0.0405027	27.5948	840.57
43.6407	98.7932	0.06	0.0405027	27.5948	841.949
43.7007	128.182	0.06	0.0405027	27.5948	843.328
43.7607	94.6909	0.07	0.0405027	27.5948	844.707
43.8307	84.4399	0.06	0.0405027	27.5948	846.316
43.8907	154.439	0.06	0.0405027	27.5948	847.696
43.9507	103.082	0.05	0.0405027	27.5948	849.078
44.0007	81.8597	0.06	0.0405027	27.5948	850.23
44.0607	76.6358	0.06	0.0405027	27.5948	851.615
44.1207	69.4418	0.05	0.0405027	27.5948	853.002
44.1707	78.3525	0.06	0.0405027	27.5948	854.16
44.2307	95.0608	0.06	0.0405027	27.5948	855.553
44.2907	97.4414	0.05	0.0405027	27.5948	856.949
44.3407	106.905	0.06	0.0405027	27.5948	858.115
44.4007	76.2167	0.06	0.0405027	27.5948	859.518
44.4607	73.9078	0.07	0.0405027	27.5948	860.925
44.5307	84.0658	0.06	0.0405027	27.5948	862.574
44.5907	106.336	0.06	0.0431395	26.0411	863.992
44.6507	86.2253	0.05	0.0431395	26.0411	865.416
44.7007	83.3588	0.06	0.0431395	26.0411	866.607
44.7607	101.369	0.06	0.0431395	26.0411	868.041
44.8207	80.6086	0.05	0.0431395	26.0411	869.48
44.8707	80.9007	0.06	0.0431395	26.0411	870.684
44.9307	94.2797	0.06	0.0431395	26.0411	872.132
44.9907	97.5234	0.06	0.0431395	26.0411	873.586
45.0507	60.8283	0.05	0.0431395	26.0411	875.045
45.1007	62.9999	0.06	0.0431395	26.0411	876.265
45.1607	65.5905	0.06	0.0431395	26.0411	877.733
45.2207	79.2723	0.06	0.0431395	26.0411	879.207
45.2807	98.5885	0.06	0.0431395	26.0411	880.685
45.3407	82.9842	0.06	0.0431395	26.0411	882.168
45.4007	67.2431	0.06	0.0431395	26.0411	883.656
45.4607	121.887	0.05	0.0431395	26.0411	885.149
45.5107	105.198	0.06	0.0431395	26.0411	886.397
45.5707	83.7747	0.06	0.0431395	26.0411	887.898
45.6307	91.355	0.07	0.0431395	26.0411	889.405
45.7007	70.708	0.06	0.0431395	26.0411	891.168
45.7607	70.1595	0.05	0.0431395	26.0411	892.684
45.8107	62.7446	0.06	0.0431395	26.0411	893.951
45.8707	101.083	0.06	0.0431395	26.0411	895.476
45.9307	89.9099	0.06	0.0431395	26.0411	897.005
46.0707	86.5571	0.06	0.0431395	26.0411	900.59
46.1307	87.4689	0.05	0.0431395	26.0411	902.134
46.1807	86.6815	0.06	0.0431395	26.0411	903.423
46.2407	118.605	0.06	0.0403482	24.5144	904.975
46.3007	65.0815	0.05	0.0403482	24.5144	906.53
46.3507	101.654	0.06	0.0403482	24.5144	907.83
46.4107	111.359	0.06	0.0403482	24.5144	909.393
46.4707	74.244	0.06	0.0403482	24.5144	910.959
46.5307	102.715	0.06	0.0403482	24.5144	912.53
46.5907	121.208	0.06	0.0403482	24.5144	914.104
46.6507	96.5391	0.06	0.0403482	24.5144	915.681
46.7107	94.4031	0.06	0.0403482	24.5144	917.262
46.7707	74.202	0.05	0.0403482	24.5144	918.846
46.8207	71.9724	0.06	0.0403482	24.5144	920.168
46.8807	86.723	0.06	0.0403482	24.5144	921.757
46.9407	132.462	0.05	0.0403482	24.5144	923.35
46.9907	116.798	0.06	0.0403482	24.5144	924.679
47.0507	78.7707	0.06	0.0403482	24.5144	926.276
47.1707	77.6829	0.06	0.0403482	24.5144	929.478
47.2307	70.5814	0.06	0.0403482	24.5144	931.082
47.2907	106.174	0.06	0.0403482	24.5144	932.689
47.3507	75.6295	0.0601	0.0403482	24.5144	934.298
47.4108	122.966	0.06	0.0403482	24.5144	935.908
47.4708	103.571	0.05	0.0403482	24.5144	937.52
47.5208	124.801	0.06	0.0403482	24.5144	938.865
47.5808	109.661	0.06	0.0403482	24.5144	940.481
47.6408	90.4056	0.06	0.0403482	24.5144	942.098
47.7008	88.7936	0.07	0.0403482	24.5144	943.716
47.7708	98.7523	0.05	0.0403482	24.5144	945.605
47.8208	128.857	0.06	0.0403482	24.5144	946.955
47.8808	126.473	0.06	0.0376489	24.1942	948.577
47.9408	81.693	0.06	0.0376489	24.1942	950.199
48.0008	93.3332	0.06	0.0376489	24.1942	951.822
48.0608	79.8572	0.06	0.0376489	24.1942	953.446
48.1208	119.286	0.06	0.0376489	24.1942	955.071
48.1808	97.9332	0.09	0.0376489	24.1942	956.696
48.2708	68.2162	0.06	0.0376489	24.1942	959.136
48.3308	87.5932	0.06	0.0376489	24.1942	960.763
48.3908	103.285	0.06	0.0376489	24.1942	962.391
48.4508	124.522	0.06	0.0376489	24.1942	964.019
48.5108	93.0038	0.05	0.0376489	24.1942	965.648
48.5608	58.5233	0.06	0.0376489	24.1942	967.006
48.6208	71.7618	0.06	0.0376489	24.1942	968.635
48.6808	107.716	0.06	0.0376489	24.1942	970.266
48.7408	102.959	0.06	0.0376489	24.1942	971.896
48.8008	88.7109	0.06	0.0376489	24.1942	973.527
48.8608	74.7901	0.07	0.0376489	24.1942	975.158
48.9308	105.239	0.06	0.0376489	24.1942	977.061
48.9908	122.207	0.06	0.0376489	24.1942	978.693
49.0508	142.219	0.05	0.0376489	24.1942	980.324
49.1008	147.296	0.06	0.0376489	24.1942	981.684
49.1608	119.246	0.06	0.0376489	24.1942	983.316
49.2208	84.5231	0.06	0.0376489	24.1942	984.948
49.2808	66.7349	0.08	0.0376489	24.1942	986.58
49.3608	42.7014	0.06	0.0376489	24.1942	988.756
49.4208	77.5155	0.06	0.0376489	24.1942	990.388
49.4808	65.5905	0.05	0.0376489	24.1942	992.02
49.5308	76.2167	0.06	0.036832	25.0022	993.38
49.5908	77.5155	0.06	0.036832	25.0022	995.011
49.6508	90.5708	0.06	0.036832	25.0022	996.642
49.7108	98.4657	0.05	0.036832	25.0022	998.273
49.7608	113.014	0.06	0.036832	25.0022	999.632
49.8208	95.143	0.06	0.036832	25.0022	1001.26
49.8808	83.2339	0.06	0.036832	25.0022	1002.89
49.9408	67.5817	0.06	0.036832	25.0022	1004.52
50.0008	75.2938	0.06	0.036832	25.0022	1006.15
50.0608	60.7856	0.05	0.036832	25.0022	1007.77
50.1108	68.3008	0.06	0.036832	25.0022	1009.13
50.1708	89.8273	0.06	0.036832	25.0022	1010.75
50.2308	79.8154	0.06	0.036832	25.0022	1012.37
50.2908	85.8934	0.05	0.036832	25.0022	1014
50.3408	71.4247	0.05	0.036832	25.0022	1015.35
50.4708	96.2333	0.05	0.036832	25.0022	1018.85
50.5208	118.223	0.06	0.036832	25.0022	1020.2
50.5808	148.407	0.05	0.036832	25.0022	1021.81
50.6308	128.308	0.05	0.036832	25.0022	1023.15
50.6808	93.131	0.06	0.036832	25.0022	1024.5
50.7408	89.779	0.05	0.036832	25.0022	1026.1
50.7908	80.0162	0.06	0.036832	25.0022	1027.44
50.8508	112.615	0.05	0.036832	25.0022	1029.05
50.9008	113.201	0.06	0.036832	25.0022	1030.38
50.9608	101.974	0.05	0.036832	25.0022	1031.98
51.0108	130.382	0.06	0.036832	25.0022	1033.31
51.0708	96.4715	0.06	0.036832	25.0022	1034.91
51.1308	90.0587	0.05	0.036832	25.0022	1036.5
51.1808	109.172	0.05	0.037107	25.6854	1037.82
51.2308	104.301	0.06	0.037107	25.6854	1039.15
51.2908	154.72	0.05	0.037107	25.6854	1040.73
51.3408	173.544	0.06	0.037107	25.6854	1042.05
51.4008	165.677	0.05	0.037107	25.6854	1043.63
51.4508	130.612	0.08	0.037107	25.6854	1044.95
51.5308	91.1371	0.05	0.037107	25.6854	1047.05
51.5808	88.0986	0.06	0.037107	25.6854	1048.36
51.6408	77.2258	0.05	0.037107	25.6854	1049.93
51.6908	97.7807	0.06	0.037107	25.6854	1051.24
51.7508	117.485	0.05	0.037107	25.6854	1052.82
51.8008	117.601	0.06	0.037107	25.6854	1054.12
51.8608	102.606	0.06	0.037107	25.6854	1055.69
51.9208	95.5977	0.06	0.037107	25.6854	1057.26
51.9808	86.7362	0.06	0.037107	25.6854	1058.83
52.0408	130.42	0.05	0.037107	25.6854	1060.4
52.0908	141.068	0.06	0.037107	25.6854	1061.71
52.1508	125.42	0.05	0.037107	25.6854	1063.28
52.2008	87.2974	0.06	0.037107	25.6854	1064.58
52.2608	74.3055	0.05	0.037107	25.6854	1066.15
52.3108	88.0586	0.06	0.037107	25.6854	1067.46
52.3708	107.564	0.05	0.037107	25.6854	1069.03
52.4208	82.5165	0.0601	0.037107	25.6854	1070.34
52.4809	92.0548	0.06	0.037107	25.6854	1071.91
52.5409	88.6991	0.06	0.037107	25.6854	1073.49
52.6609	98.2564	0.06	0.037107	25.6854	1076.64
52.7209	88.8191	0.06	0.037107	25.6854	1078.22
52.7809	98.0186	0.05	0.037107	25.6854	1079.8
52.8309	82.9192	0.06	0.0381062	25.094	1081.12
52.8909	97.3445	0.07	0.0381062	25.094	1082.71
52.9609	109.76	0.06	0.0381062	25.094	1084.56
53.0209	81.5091	0.06	0.0381062	25.094	1086.15
53.0809	110.465	0.05	0.0381062	25.094	1087.75
53.1309	126.653	0.06	0.0381062	25.094	1089.08
53.1909	97.2652	0.06	0.0381062	25.094	1090.67
53.2509	102.448	0.06	0.0381062	25.094	1092.27
53.3109	103.828	0.05	0.0381062	25.094	1093.88
53.3609	111.951	0.06	0.0381062	25.094	1095.21
53.4209	85.2915	0.06	0.0381062	25.094	1096.82
53.4809	113.201	0.05	0.0381062	25.094	1098.43
53.5309	104.261	0.06	0.0381062	25.094	1099.77
53.5909	122.988	0.06	0.0381062	25.094	1101.38
53.6509	134.708	0.08	0.0381062	25.094	1102.99
53.7309	151.869	0.06	0.0381062	25.094	1105.15
53.7909	110.308	0.06	0.0381062	25.094	1106.76
53.8509	143.457	0.05	0.0381062	25.094	1108.38
53.9009	161.256	0.06	0.0381062	25.094	1109.74
53.9609	135.396	0.06	0.0381062	25.094	1111.36
54.0209	108.584	0.06	0.0381062	25.094	1112.98
54.0809	98.0978	0.06	0.0381062	25.094	1114.61
54.1409	114.41	0.07	0.0381062	25.094	1116.24
54.2109	110.543	0.05	0.0381062	25.094	1118.14
54.2609	87.9384	0.06	0.0381062	25.094	1119.5
54.3209	72.5572	0.06	0.0381062	25.094	1121.13
54.3809	110.582	0.06	0.0381062	25.094	1122.76
54.4409	104.576	0.06	0.0381062	25.094	1124.4
54.5009	100.868	0.06	0.0372124	25.688	1126.03
54.5609	95.0015	0.06	0.0372124	25.688	1127.67
54.6209	70.9687	0.06	0.0372124	25.688	1129.31
54.6809	125.189	0.05	0.0372124	25.688	1130.95
54.7309	92.0947	0.05	0.0372124	25.688	1132.32
54.8309	105.009	0.05	0.0372124	25.688	1135.05
54.8809	121.867	0.06	0.0372124	25.688	1136.42
54.9409	101.737	0.05	0.0372124	25.688	1138.06
54.9909	94.1264	0.06	0.0372124	25.688	1139.42
55.0509	123.297	0.06	0.0372124	25.688	1141.06
55.1109	150.177	0.06	0.0372124	25.688	1142.7
55.1709	107.329	0.06	0.0372124	25.688	1144.34
55.2309	102.606	0.06	0.0372124	25.688	1145.98
55.2909	91.3367	0.05	0.0372124	25.688	1147.61
55.3409	102.645	0.06	0.0372124	25.688	1148.97
55.4009	96.67	0.05	0.0372124	25.688	1150.6
55.4509	90.8976	0.06	0.0372124	25.688	1151.96
55.5109	101.856	0.05	0.0372124	25.688	1153.59
55.5609	92.2941	0.06	0.0372124	25.688	1154.94
55.6209	94.7231	0.06	0.0372124	25.688	1156.57
55.6809	93.6885	0.05	0.0372124	25.688	1158.19
55.7309	102.724	0.06	0.0372124	25.688	1159.53
55.7909	130.804	0.05	0.0372124	25.688	1161.15
55.8409	124.186	0.05	0.0372124	25.688	1162.49
55.9709	129.23	0.06	0.0372124	25.688	1165.97
56.0309	148.219	0.06	0.0372124	25.688	1167.57
56.0909	119.93	0.06	0.0372124	25.688	1169.16
56.1509	145.69	0.05	0.0368633	26.7272	1170.76
56.2009	112.029	0.06	0.0368633	26.7272	1172.08
56.2609	112.381	0.06	0.0368633	26.7272	1173.66
56.3209	104.34	0.06	0.0368633	26.7272	1175.24
56.3809	106.425	0.05	0.0368633	26.7272	1176.81
56.4309	102.053	0.06	0.0368633	26.7272	1178.12
56.4909	100.71	0.06	0.0368633	26.7272	1179.69
56.5509	93.6089	0.06	0.0368633	26.7272	1181.25
56.6109	109.995	0.05	0.0368633	26.7272	1182.82
56.6609	100.315	0.06	0.0368633	26.7272	1184.12
56.7209	98.0186	0.06	0.0368633	26.7272	1185.67
56.7809	116.863	0.06	0.0368633	26.7272	1187.23
56.8409	89.9389	0.06	0.0368633	26.7272	1188.78
56.9009	69.5816	0.05	0.0368633	26.7272	1190.32
56.9509	104.576	0.08	0.0368633	26.7272	1191.61
57.0309	94.4845	0.06	0.0368633	26.7272	1193.67
57.0909	103.118	0.05	0.0368633	26.7272	1195.22
57.1409	78.1568	0.06	0.0368633	26.7272	1196.5
57.2009	76.5371	0.05	0.0368633	26.7272	1198.04
57.2509	97.7411	0.06	0.0368633	26.7272	1199.32
57.3109	89.2192	0.05	0.0368633	26.7272	1200.86
57.3609	80.9848	0.06	0.0368633	26.7272	1202.14
57.4209	70.6017	0.05	0.0368633	26.7272	1203.68
57.4709	123.993	0.05	0.0368633	26.7272	1204.96
57.5209	122.331	0.06	0.0368633	26.7272	1206.24
57.5809	123.8	0.06	0.0368633	26.7272	1207.78
57.6409	179.268	0.0501	0.0368633	26.7272	1209.31
57.691	162.93	0.0599	0.0368633	26.7272	1210.59
57.7509	130.497	0.0501	0.0386417	26.7701	1212.13
57.801	135.09	0.06	0.0386417	26.7701	1213.41
57.861	122.563	0.05	0.0386417	26.7701	1214.95
57.911	116.318	0.06	0.0386417	26.7701	1216.23
57.971	102.606	0.05	0.0386417	26.7701	1217.77
58.021	109.368	0.05	0.0386417	26.7701	1219.05
58.071	109.995	0.09	0.0386417	26.7701	1220.34
58.161	109.642	0.05	0.0386417	26.7701	1222.65
58.211	98.811	0.05	0.0386417	26.7701	1223.94
58.261	91.7756	0.05	0.0386417	26.7701	1225.23
58.311	90.4583	0.05	0.0386417	26.7701	1226.52
58.361	91.7756	0.04	0.0386417	26.7701	1227.81
58.401	114.41	0.05	0.0386417	26.7701	1228.84
58.451	110.073	0.05	0.0386417	26.7701	1230.14
58.501	86.0141	0.07	0.0386417	26.7701	1231.43
58.571	125.767	0.05	0.0386417	26.7701	1233.25
58.621	170.891	0.05	0.0386417	26.7701	1234.55
58.671	139.054	0.04	0.0386417	26.7701	1235.85
58.711	107.446	0.05	0.0386417	26.7701	1236.89
58.761	128.808	0.05	0.0386417	26.7701	1238.2
58.811	135.014	0.05	0.0386417	26.7701	1239.5
58.861	107.289	0.05	0.0386417	26.7701	1240.81
58.911	112.81	0.05	0.0386417	26.7701	1242.12
58.961	126.538	0.05	0.0386417	26.7701	1243.44
59.011	149.876	0.05	0.0386417	26.7701	1244.75
59.061	109.642	0.05	0.0386417	26.7701	1246.07
59.111	126.846	0.05	0.0386417	26.7701	1247.39
59.161	107.564	0.05	0.0386417	26.7701	1248.72
59.271	129.576	0.06	0.0386417	26.7701	1251.64
59.331	102.251	0.06	0.0386417	26.7701	1253.24
59.391	118.961	0.06	0.0386417	26.7701	1254.84
59.451	120.047	0.06	0.0383899	26.0909	1256.45
59.511	130.88	0.06	0.0383899	26.0909	1258.06
59.571	113.942	0.06	0.0383899	26.0909	1259.68
59.631	176.043	0.05	0.0383899	26.0909	1261.3
59.681	152.207	0.06	0.0383899	26.0909	1262.66
59.741	99.484	0.06	0.0383899	26.0909	1264.29
59.801	118.689	0.06	0.0383899	26.0909	1265.92
59.861	104.852	0.06	0.0383899	26.0909	1267.55
59.921	101.342	0.06	0.0383899	26.0909	1269.19
59.981	169.562	0.07	0.0383899	26.0909	1270.83
60.051	239.166	0.06	0.0383899	26.0909	1272.75
60.111	253.826	0.05	0.0383899	26.0909	1274.39
60.161	291.194	0.06	0.0383899	26.0909	1275.77
60.221	292.617	0.06	0.0383899	26.0909	1277.41
60.281	213.27	0.09	0.0383899	26.0909	1279.07
60.371	89.4991	0.05	0.0383899	26.0909	1281.54
60.421	132.911	0.05	0.0383899	26.0909	1282.92
60.471	113.942	0.06	0.0383899	26.0909	1284.3
60.531	90.1387	0.05	0.0383899	26.0909	1285.96
60.581	111.052	0.05	0.0383899	26.0909	1287.34
60.631	82.5165	0.05	0.0383899	26.0909	1288.72
60.681	130.152	0.06	0.0383899	26.0909	1290.1
60.741	106.661	0.05	0.0383899	26.0909	1291.76
60.791	93.8478	0.05	0.0383899	26.0909	1293.14
60.841	91.7756	0.06	0.0383899	26.0909	1294.52
60.901	110.269	0.06	0.0383899	26.0909	1296.17
60.961	109.995	0.05	0.0383899	26.0909	1297.83
61.011	114.566	0.05	0.0383899	26.0909	1299.21
61.061	102.369	0.06	0.0365044	26.0691	1300.59
61.121	105.363	0.05	0.0365044	26.0691	1302.24
61.171	113.981	0.05	0.0365044	26.0691	1303.61
61.221	118.029	0.05	0.0365044	26.0691	1304.99
61.271	90.2585	0.06	0.0365044	26.0691	1306.36
61.331	143.76	0.05	0.0365044	26.0691	1308.01
61.381	99.4049	0.06	0.0365044	26.0691	1309.39
61.441	104.813	0.05	0.0365044	26.0691	1311.03
61.491	147.238	0.05	0.0365044	26.0691	1312.41
61.541	119.232	0.05	0.0365044	26.0691	1313.78
61.591	132.069	0.04	0.0365044	26.0691	1315.15
61.631	113.474	0.05	0.0365044	26.0691	1316.25
61.681	116.785	0.05	0.0365044	26.0691	1317.62
61.731	84.8095	0.05	0.0365044	26.0691	1318.99
61.781	96.0347	0.05	0.0365044	26.0691	1320.36
61.831	138.864	0.06	0.0365044	26.0691	1321.73
61.891	134.746	0.05	0.0365044	26.0691	1323.37
61.941	81.9928	0.05	0.0365044	26.0691	1324.74
61.991	89.0992	0.05	0.0365044	26.0691	1326.11
62.041	116.201	0.04	0.0365044	26.0691	1327.48
62.081	119.736	0.05	0.0365044	26.0691	1328.57
62.131	121.325	0.05	0.0365044	26.0691	1329.94
62.181	134.746	0.05	0.0365044	26.0691	1331.31
62.231	100.196	0.05	0.0365044	26.0691	1332.68
62.281	104.379	0.04	0.0365044	26.0691	1334.05
62.321	114.488	0.05	0.0365044	26.0691	1335.14
62.371	102.014	0.05	0.0365044	26.0691	1336.51
62.421	99.484	0.05	0.0365044	26.0691	1337.88
62.471	101.619	0.09	0.0365044	26.0691	1339.25
62.561	84.6889	0.06	0.0365044	26.0691	1341.72
62.621	132.337	0.07	0.0365044	26.0691	1343.37
62.691	141.637	0.05	0.0365044	26.0691	1345.29
62.741	151.493	0.06	0.0364641	26.791	1346.66
62.801	148.558	0.05	0.0364641	26.791	1348.3
62.851	116.279	0.06	0.0364641	26.791	1349.68
62.911	114.332	0.0501	0.0364641	26.791	1351.33
62.9611	138.712	0.06	0.0364641	26.791	1352.7
63.0211	141.334	0.06	0.0364641	26.791	1354.35
63.0811	130.957	0.05	0.0364641	26.791	1355.99
63.1311	127.769	0.06	0.0364641	26.791	1357.36
63.1911	117.252	0.05	0.0364641	26.791	1359.01
63.2411	108.859	0.06	0.0364641	26.791	1360.38
63.3011	86.8164	0.05	0.0364641	26.791	1362.02
63.3511	93.6089	0.06	0.0364641	26.791	1363.39
63.4111	107.407	0.05	0.0364641	26.791	1365.03
63.4611	161.777	0.07	0.0364641	26.791	1366.39
63.5311	146.936	0.05	0.0364641	26.791	1368.3
63.5811	120.085	0.08	0.0364641	26.791	1369.66
63.6611	71.7021	0.06	0.0364641	26.791	1371.84
63.7211	100.987	0.06	0.0364641	26.791	1373.46
63.7811	110.191	0.05	0.0364641	26.791	1375.09
63.8311	114.098	0.06	0.0364641	26.791	1376.44
63.8911	148.633	0.06	0.0364641	26.791	1378.05
63.9511	271.669	0.05	0.0364641	26.791	1379.66
64.0011	324.418	0.06	0.0364641	26.791	1381.01
64.0611	194.421	0.06	0.0364641	26.791	1382.61
64.1211	152.733	0.06	0.0364641	26.791	1384.21
64.1811	126.692	0.06	0.0364641	26.791	1385.81
64.2411	94.922	0.06	0.0364641	26.791	1387.4
64.3011	102.211	0.06	0.0364641	26.791	1388.98
64.3611	111.208	0.05	0.0368797	27.2898	1390.56
64.4111	82.6776	0.06	0.0368797	27.2898	1391.88
64.4711	91.217	0.06	0.0368797	27.2898	1393.45
64.5311	100.987	0.05	0.0368797	27.2898	1395.01
64.5811	56.1369	0.06	0.0368797	27.2898	1396.31
64.6411	99.7215	0.06	0.0368797	27.2898	1397.87
64.7511	76.8613	0.04	0.0368797	27.2898	1400.73
64.7911	68.3152	0.04	0.0368797	27.2898	1401.76
64.8311	85.0907	0.04	0.0368797	27.2898	1402.8
64.8711	87.4577	0.04	0.0368797	27.2898	1403.84
64.9111	128.615	0.04	0.0368797	27.2898	1404.87
64.9511	132.987	0.04	0.0368797	27.2898	1405.91
64.9911	135.586	0.04	0.0368797	27.2898	1406.95
65.0311	141.637	0.04	0.0368797	27.2898	1407.98
65.0711	124.88	0.04	0.0368797	27.2898	1409.02
65.1111	171.371	0.04	0.0368797	27.2898	1410.06
65.1511	167.048	0.04	0.0368797	27.2898	1411.1
65.1911	143.609	0.05	0.0368797	27.2898	1412.15
65.2411	131.724	0.04	0.0368797	27.2898	1413.45
65.2811	143.192	0.04	0.0368797	27.2898	1414.5
65.3211	133.523	0.04	0.0368797	27.2898	1415.55
65.3611	105.285	0.04	0.0368797	27.2898	1416.6
65.4011	103.316	0.04	0.0368797	27.2898	1417.65
65.4411	107.682	0.04	0.0368797	27.2898	1418.71
65.4811	110.269	0.04	0.0368797	27.2898	1419.77
65.5211	135.968	0.04	0.0368797	27.2898	1420.83
65.5611	105.914	0.04	0.0368797	27.2898	1421.9
65.6011	127.769	0.04	0.0368797	27.2898	1422.96
65.6411	108.114	0.04	0.0368797	27.2898	1424.04
65.6811	136.197	0.04	0.0368797	27.2898	1425.12
65.7211	145.501	0.04	0.0368797	27.2898	1426.2
65.7611	105.049	0.09	0.0368797	27.2898	1427.28
65.8511	79.087	0.03	0.0368797	27.2898	1429.74
65.8811	81.63	0.04	0.0368797	27.2898	1430.57
65.9211	99.8797	0.04	0.0368797	27.2898	1431.67
65.9611	87.7782	0.03	0.0368797	27.2898	1432.78
65.9911	138.331	0.04	0.0368797	27.2898	1433.62
66.0311	115.462	0.04	0.037844	24.9375	1434.74
66.0711	83.6435	0.04	0.037844	24.9375	1435.87
66.1111	86.6159	0.03	0.037844	24.9375	1437
66.1411	105.914	0.04	0.037844	24.9375	1437.85
66.1811	131.264	0.04	0.037844	24.9375	1438.99
66.2211	91.2968	0.03	0.037844	24.9375	1440.14
66.2511	99.9984	0.04	0.037844	24.9375	1441
66.2911	79.0465	0.04	0.037844	24.9375	1442.15
66.3311	102.921	0.04	0.037844	24.9375	1443.31
66.3711	85.5324	0.03	0.037844	24.9375	1444.47
66.4011	64.3827	0.04	0.037844	24.9375	1445.35
66.4411	90.9375	0.04	0.037844	24.9375	1446.52
66.4811	83.5631	0.04	0.037844	24.9375	1447.69
66.5211	82.7984	0.03	0.037844	24.9375	1448.87
66.5511	73.574	0.04	0.037844	24.9375	1449.75
66.5911	153.033	0.04	0.037844	24.9375	1450.93
66.6311	102.487	0.03	0.037844	24.9375	1452.12
66.6611	87.3375	0.04	0.037844	24.9375	1453.01
66.7011	129.806	0.04	0.037844	24.9375	1454.2
66.7411	101.026	0.04	0.037844	24.9375	1455.39
66.7811	96.4318	0.03	0.037844	24.9375	1456.59
66.8111	95.9155	0.04	0.037844	24.9375	1457.48
66.8511	113.357	0.04	0.037844	24.9375	1458.68
66.8911	83.1607	0.03	0.037844	24.9375	1459.88
66.9211	95.2798	0.02	0.037844	24.9375	1460.78
66.9411	135.586	0.03	0.037844	24.9375	1461.38
66.9711	155.432	0.03	0.037844	24.9375	1462.28
67.0011	166.492	0.03	0.037844	24.9375	1463.19
67.0311	160.101	0.03	0.037844	24.9375	1464.09
67.0611	146.407	0.03	0.037844	24.9375	1464.99
67.0911	145.501	0.02	0.037844	24.9375	1465.9
67.1111	192.796	0.03	0.037844	24.9375	1466.5
67.1411	121.247	0.03	0.037844	24.9375	1467.4
67.1711	102.645	0.03	0.037844	24.9375	1468.31
67.2011	136.35	0.03	0.037844	24.9375	1469.21
67.2311	135.09	0.03	0.037844	24.9375	1470.12
67.2611	129	0.02	0.037844	24.9375	1471.02
67.2811	143.684	0.03	0.037844	24.9375	1471.63
67.3111	118.029	0.03	0.037844	24.9375	1472.53
67.3411	132.107	0.03	0.037844	24.9375	1473.43
67.3711	106.936	0.03	0.037844	24.9375	1474.34
67.4011	137.303	0.03	0.037844	24.9375	1475.24
67.4311	78.9657	0.02	0.037844	24.9375	1476.14
67.4511	107.839	0.03	0.037844	24.9375	1476.75
67.4811	120.24	0.03	0.037844	24.9375	1477.65
67.5111	96.8684	0.03	0.037844	24.9375	1478.55
67.5411	112.693	0.03	0.037844	24.9375	1479.45
67.5711	97.3842	0.03	0.037844	24.9375	1480.35
67.6011	124.649	0.02	0.037844	24.9375	1481.25
67.6211	107.368	0.03	0.037844	24.9375	1481.84
67.6511	99.8402	0.03	0.0337838	25.3031	1482.74
67.6811	102.724	0.03	0.0337838	25.3031	1483.64
67.7111	110.778	0.03	0.0337838	25.3031	1484.53
67.7411	83.2412	0.03	0.0337838	25.3031	1485.42
67.7711	95.7566	0.02	0.0337838	25.3031	1486.31
67.7911	171.85	0.03	0.0337838	25.3031	1486.91
67.8211	118.805	0.04	0.0337838	25.3031	1487.8
67.8611	116.513	0.02	0.0337838	25.3031	1488.98
67.8811	109.642	0.03	0.0337838	25.3031	1489.57
67.9111	126.499	0.03	0.0337838	25.3031	1490.46
67.9411	129.269	0.0301	0.0337838	25.3031	1491.35
67.9712	115.89	0.07	0.0337838	25.3031	1492.23
68.0412	142.624	0.06	0.0337838	25.3031	1494.29
68.1012	126.345	0.06	0.0337838	25.3031	1496.06
68.1612	106.425	0.06	0.0337838	25.3031	1497.82
68.2212	99.4049	0.06	0.0337838	25.3031	1499.57
68.2812	99.8797	0.06	0.0337838	25.3031	1501.33
68.3412	120.938	0.06	0.0337838	25.3031	1503.08
68.4012	99.6423	0.06	0.0337838	25.3031	1504.83
68.4612	94.6436	0.06	0.0337838	25.3031	1506.57
68.5212	109.76	0.07	0.0337838	25.3031	1508.32
68.5912	156.742	0.06	0.0337838	25.3031	1510.35
68.6512	117.135	0.06	0.0337838	25.3031	1512.09
68.7112	104.694	0.06	0.0337838	25.3031	1513.83
68.7712	111.13	0.06	0.0337838	25.3031	1515.57
68.8312	127.693	0.06	0.0337838	25.3031	1517.31
68.8912	114.878	0.07	0.0337838	25.3031	1519.04
68.9612	187.144	0.06	0.0337838	25.3031	1521.07
69.0212	179.232	0.06	0.0337838	25.3031	1522.8
69.0812	135.548	0.07	0.0337838	25.3031	1524.54
69.1512	100.513	0.06	0.0337838	25.3031	1526.56
69.2112	106.739	0.06	0.0337838	25.3031	1528.3
69.2712	96.5509	0.06	0.0337838	25.3031	1530.03
69.3312	116.396	0.06	0.0342608	25.6026	1531.77
69.3912	94.0866	0.06	0.0342608	25.6026	1533.51
69.4512	108.623	0.06	0.0342608	25.6026	1535.24
69.5112	105.521	0.05	0.0342608	25.6026	1536.98
69.5612	110.66	0.06	0.0342608	25.6026	1538.43
69.6212	100.592	0.07	0.0342608	25.6026	1540.17
69.6912	99.484	0.05	0.0342608	25.6026	1542.2
69.7412	88.3789	0.06	0.0342608	25.6026	1543.65
69.8012	98.5337	0.06	0.0342608	25.6026	1545.39
69.8612	94.4845	0.06	0.0342608	25.6026	1547.14
69.9212	121.364	0.06	0.0342608	25.6026	1548.88
69.9812	82.0734	0.06	0.0342608	25.6026	1550.62
70.0412	113.552	0.06	0.0342608	25.6026	1552.37
70.1012	121.635	0.06	0.0342608	25.6026	1554.11
70.1612	121.828	0.07	0.0342608	25.6026	1555.86
70.2312	99.207	0.06	0.0342608	25.6026	1557.89
70.2912	116.24	0.06	0.0342608	25.6026	1559.64
70.3512	110.66	0.06	0.0342608	25.6026	1561.39
70.4112	109.486	0.06	0.0342608	25.6026	1563.13
70.4712	120.821	0.06	0.0342608	25.6026	1564.88
70.5312	124.687	0.06	0.0342608	25.6026	1566.63
70.5912	128.423	0.06	0.0342608	25.6026	1568.38
70.6512	124.649	0.05	0.0342608	25.6026	1570.12
70.7012	104.576	0.06	0.0342608	25.6026	1571.58
70.7612	88.1787	0.06	0.0342608	25.6026	1573.33
70.8212	99.9984	0.06	0.0342608	25.6026	1575.08
70.8812	120.628	0.06	0.0342608	25.6026	1576.83
70.9412	104.301	0.06	0.0342608	25.6026	1578.58
71.0012	108.898	0.06	0.0343965	25.458	1580.33
71.0612	145.122	0.06	0.0343965	25.458	1582.08
71.1212	98.4545	0.05	0.0343965	25.458	1583.83
71.1712	87.658	0.06	0.0343965	25.458	1585.29
71.2312	93.9672	0.1	0.0343965	25.458	1587.04
71.3312	96.5906	0.06	0.0343965	25.458	1589.96
71.3912	107.446	0.05	0.0343965	25.458	1591.71
71.4412	106.857	0.06	0.0343965	25.458	1593.18
71.5012	127.308	0.06	0.0343965	25.458	1594.93
71.5612	128.346	0.06	0.0343965	25.458	1596.69
71.6212	141.296	0.05	0.0343965	25.458	1598.45
71.6712	144.366	0.06	0.0343965	25.458	1599.92
71.7312	101.421	0.06	0.0343965	25.458	1601.68
71.7912	111.677	0.06	0.0343965	25.458	1603.44
71.8512	113.669	0.06	0.0343965	25.458	1605.21
71.9112	102.014	0.05	0.0343965	25.458	1606.98
71.9612	101.619	0.06	0.0343965	25.458	1608.45
72.0212	120.667	0.08	0.0343965	25.458	1610.22
72.1012	121.209	0.06	0.0343965	25.458	1612.59
72.1612	97.8996	0.05	0.0343965	25.458	1614.37
72.2112	108.545	0.06	0.0343965	25.458	1615.85
72.2712	104.576	0.06	0.0343965	25.458	1617.63
72.3312	127.654	0.06	0.0343965	25.458	1619.42
72.3912	134.02	0.05	0.0343965	25.458	1621.21
72.4412	136.998	0.05	0.0343965	25.458	1622.7
72.4912	146.709	0.06	0.0343965	25.458	1624.2
72.5512	114.917	0.06	0.0343965	25.458	1626
72.6112	106.818	0.06	0.0339297	24.9858	1627.8
72.6712	93.4894	0.06	0.0339297	24.9858	1629.61
72.7312	98.8506	0.06	0.0339297	24.9858	1631.42
72.7912	98.9694	0.06	0.0339297	24.9858	1633.23
72.8512	106.229	0.06	0.0339297	24.9858	1635.04
72.9112	101.658	0.06	0.0339297	24.9858	1636.86
72.9712	99.3257	0.06	0.0339297	24.9858	1638.68
73.0312	114.994	0.06	0.0339297	24.9858	1640.51
73.0912	119.542	0.06	0.0339297	24.9858	1642.33
73.1512	86.8966	0.0601	0.0339297	24.9858	1644.16
73.2113	111.638	0.0599	0.0339297	24.9858	1645.99
73.2712	156.667	0.0601	0.0339297	24.9858	1647.82
73.3313	266.609	0.06	0.0339297	24.9858	1649.65
73.3913	343.386	0.06	0.0339297	24.9858	1651.49
73.4513	208.579	0.06	0.0339297	24.9858	1653.32
73.5813	105.245	0.05	0.0339297	24.9858	1657.3
73.6313	100.275	0.06	0.0339297	24.9858	1658.83
73.6913	112.185	0.06	0.0339297	24.9858	1660.67
73.7513	126.307	0.05	0.0339297	24.9858	1662.51
73.8013	121.789	0.06	0.0339297	24.9858	1664.04
73.8613	115.501	0.06	0.0339297	24.9858	1665.88
73.9213	99.6423	0.05	0.0339297	24.9858	1667.71
73.9713	120.279	0.06	0.0339297	24.9858	1669.24
74.0313	98.9298	0.06	0.0339297	24.9858	1671.08
74.0913	134.861	0.05	0.0339297	24.9858	1672.91
74.1413	134.593	0.06	0.0339297	24.9858	1674.44
74.2013	116.279	0.06	0.0339297	24.9858	1676.27
74.2613	96.0744	0.05	0.0328032	25.2675	1678.1
74.3113	75.0364	0.06	0.0328032	25.2675	1679.63
74.3713	88.8591	0.06	0.0328032	25.2675	1681.46
74.4313	91.7357	0.06	0.0328032	25.2675	1683.28
74.4913	120.008	0.05	0.0328032	25.2675	1685.11
74.5413	109.055	0.09	0.0328032	25.2675	1686.63
74.6313	116.591	0.05	0.0328032	25.2675	1689.36
74.6813	200.537	0.06	0.0328032	25.2675	1690.88
74.7413	184.634	0.06	0.0328032	25.2675	1692.7
74.8013	160.101	0.05	0.0328032	25.2675	1694.52
74.8513	119.077	0.06	0.0328032	25.2675	1696.03
74.9113	121.015	0.06	0.0328032	25.2675	1697.85
74.9713	111.638	0.05	0.0328032	25.2675	1699.67
75.0213	124.417	0.06	0.0328032	25.2675	1701.18
75.0813	108.584	0.06	0.0328032	25.2675	1703
75.1413	80.7427	0.06	0.0328032	25.2675	1704.82
75.2013	112.537	0.05	0.0328032	25.2675	1706.64
75.2513	91.6559	0.06	0.0328032	25.2675	1708.16
75.3113	122.679	0.06	0.0328032	25.2675	1709.98
75.3713	128.923	0.05	0.0328032	25.2675	1711.8
75.4213	107.329	0.06	0.0328032	25.2675	1713.31
75.4813	165.714	0.06	0.0328032	25.2675	1715.13
75.5413	229.111	0.05	0.0328032	25.2675	1716.96
75.5913	237.26	0.06	0.0328032	25.2675	1718.48
75.6513	155.395	0.06	0.0328032	25.2675	1720.3
75.7713	104.419	0.06	0.0328032	25.2675	1723.95
75.8313	95.24	0.05	0.0328032	25.2675	1725.78
75.8813	97.3842	0.06	0.0328032	25.2675	1727.31
75.9413	90.3384	0.08	0.032921	25.0057	1729.14
76.0213	107.329	0.06	0.032921	25.0057	1731.59
76.0813	104.419	0.05	0.032921	25.0057	1733.43
76.1313	91.4564	0.06	0.032921	25.0057	1734.96
76.1913	114.761	0.06	0.032921	25.0057	1736.8
76.2513	86.0141	0.06	0.032921	25.0057	1738.64
76.3113	167.899	0.05	0.032921	25.0057	1740.48
76.3613	165.899	0.06	0.032921	25.0057	1742.01
76.4213	156.816	0.06	0.032921	25.0057	1743.86
76.4813	103.355	0.06	0.032921	25.0057	1745.7
76.5413	89.8989	0.05	0.032921	25.0057	1747.55
76.5913	129.038	0.06	0.032921	25.0057	1749.09
76.6513	168.823	0.07	0.032921	25.0057	1750.93
76.7213	147.238	0.06	0.032921	25.0057	1753.09
76.7813	116.785	0.06	0.032921	25.0057	1754.93
76.9113	82.3317	0.05	0.032921	25.0057	1758.93
76.9613	81.045	0.04	0.032921	25.0057	1760.47
77.0013	81.811	0.05	0.032921	25.0057	1761.7
77.0513	88.5998	0.06	0.032921	25.0057	1763.24
77.1113	77.0879	0.05	0.032921	25.0057	1765.08
77.1613	90.2781	0.04	0.032921	25.0057	1766.62
77.2013	70.3828	0.05	0.032921	25.0057	1767.85
77.2513	82.8828	0.05	0.032921	25.0057	1769.39
77.3013	80.0335	0.05	0.032921	25.0057	1770.92
77.3513	80.5546	0.05	0.032921	25.0057	1772.45
77.4013	89.1187	0.04	0.032921	25.0057	1773.99
77.4413	108.889	0.05	0.032921	25.0057	1775.21
77.4913	95.396	0.05	0.032921	25.0057	1776.74
77.5413	84.0153	0.05	0.032921	25.0057	1778.27
77.5913	87.7143	0.05	0.0325701	25.186	1779.8
77.6413	98.6184	0.04	0.0325701	25.186	1781.33
77.6813	110.792	0.05	0.0325701	25.186	1782.55
77.7313	80.5546	0.05	0.0325701	25.186	1784.08
77.7813	142.902	0.05	0.0325701	25.186	1785.6
77.8313	180.916	0.05	0.0325701	25.186	1787.13
77.8813	151.206	0.05	0.0325701	25.186	1788.65
77.9313	111.607	0.05	0.0325701	25.186	1790.18
77.9813	116.822	0.05	0.0325701	25.186	1791.7
78.0313	124.453	0.0501	0.0325701	25.186	1793.23
78.0814	117.634	0.0499	0.0325701	25.186	1794.75
78.1313	95.8827	0.06	0.0325701	25.186	1796.28
78.1913	92.2293	0.05	0.0325701	25.186	1798.11
78.2413	86.156	0.06	0.0325701	25.186	1799.63
78.3013	94.97	0.05	0.0325701	25.186	1801.47
78.3513	100.622	0.0501	0.0325701	25.186	1802.99
78.4014	103.23	0.05	0.0325701	25.186	1804.52
78.4514	122.053	0.06	0.0325701	25.186	1806.05
78.5114	96.0044	0.05	0.0325701	25.186	1807.89
78.5614	111.577	0.05	0.0325701	25.186	1809.43
78.6114	112.271	0.05	0.0325701	25.186	1810.96
78.6614	137.129	0.05	0.0325701	25.186	1812.5
78.7114	145.278	0.06	0.0325701	25.186	1814.04
78.7714	103.321	0.05	0.0325701	25.186	1815.89
78.8214	97.6765	0.05	0.0325701	25.186	1817.43
78.8714	106.016	0.05	0.0325701	25.186	1818.98
78.9214	75.214	0.06	0.0325701	25.186	1820.53
78.9814	89.729	0.09	0.0325701	25.186	1822.39
79.0714	95.4568	0.06	0.0325701	25.186	1825.19
79.1314	107.045	0.05	0.0325701	25.186	1827.07
79.1814	109.645	0.06	0.0325701	25.186	1828.63
79.2414	139.779	0.05	0.0325572	24.8612	1830.52
79.2914	183.86	0.06	0.0325572	24.8612	1832.09
79.3514	138.499	0.06	0.0325572	24.8612	1833.98
79.4114	101.047	0.06	0.0325572	24.8612	1835.88
79.4714	80.4627	0.06	0.0325572	24.8612	1837.77
79.5314	86.5534	0.06	0.0325572	24.8612	1839.68
79.5914	84.3518	0.05	0.0325572	24.8612	1841.58
79.6414	80.4933	0.06	0.0325572	24.8612	1843.17
79.7014	91.8027	0.06	0.0325572	24.8612	1845.08
79.7614	69.3349	0.05	0.0325572	24.8612	1846.99
79.8114	83.3114	0.06	0.0325572	24.8612	1848.58
79.8714	98.2235	0.05	0.0325572	24.8612	1850.49
79.9214	108.345	0.06	0.0325572	24.8612	1852.08
79.9814	84.4742	0.06	0.0325572	24.8612	1853.99
80.1214	93.5088	0.06	0.0325572	24.8612	1858.45
80.1814	82.6379	0.05	0.0325572	24.8612	1860.35
80.2314	88.1113	0.05	0.0325572	24.8612	1861.94
80.2814	106.379	0.05	0.0325572	24.8612	1863.53
80.3314	97.2206	0.08	0.0325572	24.8612	1865.11
80.4114	84.0765	0.05	0.0325572	24.8612	1867.63
80.4614	91.5284	0.05	0.0325572	24.8612	1869.21
80.5114	88.264	0.05	0.0325572	24.8612	1870.78
80.5614	97.0686	0.05	0.0325572	24.8612	1872.35
80.6114	95.7306	0.05	0.0325572	24.8612	1873.92
80.6614	79.9415	0.06	0.0325572	24.8612	1875.48
80.7214	88.0197	0.05	0.0325572	24.8612	1877.35
80.7714	91.193	0.05	0.0325572	24.8612	1878.9
80.8214	84.8413	0.05	0.0325572	24.8612	1880.44
80.8714	97.5854	0.05	0.0316638	26.0713	1881.99
80.9214	114.503	0.05	0.0316638	26.0713	1883.52
80.9714	105.986	0.05	0.0316638	26.0713	1885.05
81.0214	97.4334	0.05	0.0316638	26.0713	1886.58
81.0714	135.34	0.05	0.0316638	26.0713	1888.1
81.1214	116.551	0.05	0.0316638	26.0713	1889.62
81.1714	102.685	0.06	0.0316638	26.0713	1891.14
81.2314	72.6614	0.05	0.0316638	26.0713	1892.95
81.2814	76.6887	0.06	0.0316638	26.0713	1894.46
81.3414	104.715	0.05	0.0316638	26.0713	1896.26
81.3914	88.2334	0.05	0.0316638	26.0713	1897.76
81.4414	98.3754	0.07	0.0316638	26.0713	1899.25
81.5114	100.835	0.06	0.0316638	26.0713	1901.35
81.5714	94.6048	0.05	0.0316638	26.0713	1903.13
81.6214	134.296	0.06	0.0316638	26.0713	1904.62
81.6814	117.905	0.05	0.0316638	26.0713	1906.41
81.7314	91.4064	0.05	0.0316638	26.0713	1907.89
81.7814	78.684	0.06	0.0316638	26.0713	1909.37
81.8414	106.833	0.05	0.0316638	26.0713	1911.15
81.8914	96.0348	0.06	0.0316638	26.0713	1912.63
81.9514	94.4222	0.06	0.0316638	26.0713	1914.41
82.0114	93.8742	0.05	0.0316638	26.0713	1916.19
82.0614	103.594	0.05	0.0316638	26.0713	1917.67
82.1114	90.5831	0.06	0.0316638	26.0713	1919.15
82.1714	103.139	0.05	0.0316638	26.0713	1920.93
82.2214	71.5532	0.06	0.0316638	26.0713	1922.41
82.2814	91.3759	0.04	0.0316638	26.0713	1924.19
82.3214	90.6441	0.05	0.0316638	26.0713	1925.37
82.3714	101.836	0.04	0.0316638	26.0713	1926.86
82.4114	155.405	0.05	0.0316638	26.0713	1928.05
82.4614	153.721	0.04	0.0316638	26.0713	1929.54
82.5014	67.7005	0.05	0.0334279	26.1207	1930.73
82.5514	54.2961	0.04	0.0334279	26.1207	1932.22
82.5914	53.3018	0.05	0.0334279	26.1207	1933.42
82.6414	70.6908	0.04	0.0334279	26.1207	1934.91
82.6814	86.2783	0.05	0.0334279	26.1207	1936.11
82.7314	77.7633	0.04	0.0334279	26.1207	1937.61
82.7714	71.7379	0.05	0.0334279	26.1207	1938.81
82.8214	77.1493	0.04	0.0334279	26.1207	1940.31
82.8614	92.5645	0.05	0.0334279	26.1207	1941.52
82.9114	121.782	0.04	0.0334279	26.1207	1943.02
82.9514	88.6303	0.05	0.0334279	26.1207	1944.23
83.0014	87.1645	0.04	0.0334279	26.1207	1945.74
83.0414	91.8636	0.05	0.0334279	26.1207	1946.95
83.0914	85.1165	0.04	0.0334279	26.1207	1948.46
83.1314	64.3348	0.05	0.0334279	26.1207	1949.67
83.1814	97.1598	0.04	0.0334279	26.1207	1951.18
83.2214	51.9961	0.05	0.0334279	26.1207	1952.39
83.2714	78.6533	0.07	0.0334279	26.1207	1953.91
83.3414	83.6175	0.04	0.0334279	26.1207	1956.04
83.3814	94.3309	0.04	0.0334279	26.1207	1957.25
83.4815	91.6503	0.05	0.0334279	26.1207	1960.29
83.5315	97.5854	0.0599	0.0334279	26.1207	1961.81
83.5914	113.055	0.0601	0.0334279	26.1207	1963.64
83.6515	105.108	0.05	0.0334279	26.1207	1965.47
83.7015	159.654	0.06	0.0334279	26.1207	1966.99
83.7615	129.724	0.06	0.0334279	26.1207	1968.83
83.8215	108.527	0.05	0.0334279	26.1207	1970.66
83.8715	89.3323	0.05	0.0334279	26.1207	1972.18
83.9815	91.3759	0.05	0.0334279	26.1207	1975.54
84.0315	117.062	0.06	0.0334279	26.1207	1977.07
84.0915	193.888	0.06	0.0334279	26.1207	1978.91
84.1515	111.215	0.05	0.0329934	25.5694	1980.74
84.2015	94.4831	0.06	0.0329934	25.5694	1982.27
84.2615	101.472	0.06	0.0329934	25.5694	1984.1
84.3215	97.3422	0.05	0.0329934	25.5694	1985.94
84.3715	108.466	0.06	0.0329934	25.5694	1987.47
84.4315	128.677	0.06	0.0329934	25.5694	1989.3
84.4915	113.055	0.03	0.0329934	25.5694	1991.14
84.5215	82.8522	0.05	0.0329934	25.5694	1992.06
84.5715	92.7473	0.05	0.0329934	25.5694	1993.59
84.6215	79.4815	0.05	0.0329934	25.5694	1995.13
84.6715	81.3514	0.04	0.0329934	25.5694	1996.66
84.7115	84.5048	0.05	0.0329934	25.5694	1997.89
84.7615	88.2334	0.05	0.0329934	25.5694	1999.43
84.8115	95.3351	0.04	0.0329934	25.5694	2000.97
84.8515	106.198	0.05	0.0329934	25.5694	2002.2
84.9015	201.153	0.05	0.0329934	25.5694	2003.74
84.9515	177.119	0.05	0.0329934	25.5694	2005.28
85.0015	147.918	0.04	0.0329934	25.5694	2006.83
85.0415	123.973	0.05	0.0329934	25.5694	2008.06
85.0915	87.1034	0.05	0.0329934	25.5694	2009.61
85.1415	109.192	0.04	0.0329934	25.5694	2011.16
85.1815	73.5536	0.05	0.0329934	25.5694	2012.4
85.2315	117.333	0.04	0.0329934	25.5694	2013.95
85.2715	89.0577	0.05	0.0329934	25.5694	2015.2
85.3215	84.1071	0.05	0.0329934	25.5694	2016.76
85.3715	75.3062	0.04	0.0329934	25.5694	2018.32
85.4115	114.593	0.05	0.0329934	25.5694	2019.57
85.4615	89.9121	0.05	0.0329934	25.5694	2021.13
85.5115	88.5693	0.04	0.0329934	25.5694	2022.7
85.5515	89.0577	0.07	0.0329934	25.5694	2023.95
85.6215	89.4849	0.04	0.0329934	25.5694	2026.16
85.6615	85.086	0.03	0.0329934	25.5694	2027.42
85.6915	107.589	0.04	0.0329934	25.5694	2028.37
85.7315	85.9421	0.04	0.0329934	25.5694	2029.63
85.7715	101.168	0.03	0.0329934	25.5694	2030.9
85.8015	74.2302	0.04	0.0322833	24.7848	2031.85
85.8415	93.2347	0.04	0.0322833	24.7848	2033.12
85.8815	87.8975	0.04	0.0322833	24.7848	2034.39
85.9215	93.6306	0.03	0.0322833	24.7848	2035.67
85.9515	91.9551	0.04	0.0322833	24.7848	2036.63
85.9915	116.189	0.04	0.0322833	24.7848	2037.9
86.0315	105.835	0.03	0.0322833	24.7848	2039.18
86.0615	97.1598	0.04	0.0322833	24.7848	2040.15
86.1015	109.705	0.04	0.0322833	24.7848	2041.43
86.1415	94.5135	0.04	0.0322833	24.7848	2042.71
86.1815	120.01	0.04	0.0322833	24.7848	2044
86.2215	131.697	0.03	0.0322833	24.7848	2045.29
86.2515	96.5822	0.04	0.0322833	24.7848	2046.25
86.2915	91.6808	0.04	0.0322833	24.7848	2047.54
86.3315	109.463	0.03	0.0322833	24.7848	2048.83
86.3615	106.833	0.04	0.0322833	24.7848	2049.8
86.4015	92.595	0.04	0.0322833	24.7848	2051.09
86.4415	81.6884	0.04	0.0322833	24.7848	2052.38
86.4815	96.6126	0.03	0.0322833	24.7848	2053.68
86.5115	124.063	0.04	0.0322833	24.7848	2054.65
86.5515	126.581	0.04	0.0322833	24.7848	2055.94
86.5915	134.773	0.03	0.0322833	24.7848	2057.23
86.6215	129.036	0.04	0.0322833	24.7848	2058.21
86.6615	138.291	0.09	0.0322833	24.7848	2059.5
86.7515	156.35	0.04	0.0322833	24.7848	2062.41
86.7915	132.205	0.04	0.0322833	24.7848	2063.71
86.8315	125.383	0.04	0.0322833	24.7848	2065
86.8715	116.641	0.04	0.0322833	24.7848	2066.3
86.9115	88.8745	0.04	0.0322833	24.7848	2067.59
86.9515	114.292	0.04	0.0322833	24.7848	2068.88
86.9915	89.2713	0.04	0.0322833	24.7848	2070.18
87.0315	93.9046	0.04	0.0322833	24.7848	2071.47
87.0715	102.381	0.04	0.0322833	24.7848	2072.76
87.1115	93.7524	0.04	0.0322833	24.7848	2074.05
87.1515	105.411	0.05	0.0322833	24.7848	2075.34
87.2015	90.5526	0.04	0.0322833	24.7848	2076.95
87.2415	87.4088	0.04	0.0322833	24.7848	2078.24
87.2815	108.799	0.04	0.0322833	24.7848	2079.52
87.3215	114.141	0.04	0.0322833	24.7848	2080.81
87.3615	110.641	0.04	0.0322833	24.7848	2082.09
87.4015	132.355	0.04	0.0322833	24.7848	2083.37
87.4415	134.534	0.03	0.0322833	24.7848	2084.65
87.4715	105.532	0.04	0.0310617	25.8599	2085.61
87.5115	98.2539	0.04	0.0310617	25.8599	2086.89
87.5515	115.798	0.04	0.0310617	25.8599	2088.16
87.5915	104.866	0.04	0.0310617	25.8599	2089.43
87.6315	102.715	0.04	0.0310617	25.8599	2090.7
87.6715	115.858	0.04	0.0310617	25.8599	2091.97
87.7115	101.017	0.04	0.0310617	25.8599	2093.24
87.7515	97.4638	0.04	0.0310617	25.8599	2094.51
87.7915	92.595	0.04	0.0310617	25.8599	2095.77
87.8315	70.6292	0.05	0.0310617	25.8599	2097.04
87.8815	76.5352	0.05	0.0310617	25.8599	2098.61
87.9315	97.1902	0.06	0.0310617	25.8599	2100.19
87.9915	77.4257	0.05	0.0310617	25.8599	2102.08
88.0415	108.829	0.06	0.0310617	25.8599	2103.65
88.1015	115.196	0.05	0.0310617	25.8599	2105.53
88.1515	118.447	0.06	0.0310617	25.8599	2107.1
88.2115	72.5075	0.05	0.0310617	25.8599	2108.98
88.2615	92.077	0.06	0.0310617	25.8599	2110.54
88.3215	92.077	0.08	0.0310617	25.8599	2112.41
88.4015	81.5965	0.06	0.0310617	25.8599	2114.91
88.4615	86.37	0.05	0.0310617	25.8599	2116.78
88.5115	114.382	0.05	0.0310617	25.8599	2118.33
88.5615	83.9235	0.0601	0.0310617	25.8599	2119.89
88.6216	102.957	0.0499	0.0310617	25.8599	2121.76
88.6715	96.2781	0.07	0.0310617	25.8599	2123.31
88.7415	119.529	0.05	0.0310617	25.8599	2125.48
88.7915	116.581	0.0601	0.0310617	25.8599	2127.03
88.8516	155.11	0.1	0.0310617	25.8599	2128.89
88.9516	93.3261	0.04	0.0310617	25.8599	2131.99
88.9916	77.4871	0.03	0.0310617	25.8599	2133.23
89.0216	101.199	0.04	0.0310617	25.8599	2134.16
89.0616	63.3456	0.04	0.0310617	25.8599	2135.4
89.1016	101.532	0.04	0.0319334	25.6743	2136.64
89.1416	100.137	0.04	0.0319334	25.6743	2137.88
89.1816	83.5869	0.03	0.0319334	25.6743	2139.12
89.2116	94.4222	0.04	0.0319334	25.6743	2140.05
89.2516	86.0949	0.04	0.0319334	25.6743	2141.29
89.2916	84.3518	0.04	0.0319334	25.6743	2142.52
89.3316	66.5895	0.03	0.0319334	25.6743	2143.76
89.3616	87.9281	0.04	0.0319334	25.6743	2144.69
89.4016	83.7093	0.04	0.0319334	25.6743	2145.93
89.4416	67.8239	0.04	0.0319334	25.6743	2147.18
89.4816	76.5659	0.04	0.0319334	25.6743	2148.42
89.5216	81.5659	0.04	0.0319334	25.6743	2149.66
89.5616	72.9076	0.03	0.0319334	25.6743	2150.9
89.5916	102.169	0.04	0.0319334	25.6743	2151.83
89.6316	101.623	0.04	0.0319334	25.6743	2153.08
89.6716	102.897	0.04	0.0319334	25.6743	2154.33
89.7116	100.197	0.03	0.0319334	25.6743	2155.57
89.7416	103.2	0.04	0.0319334	25.6743	2156.51
89.7816	103.897	0.04	0.0319334	25.6743	2157.76
89.8216	102.988	0.04	0.0319334	25.6743	2159.01
89.8616	108.406	0.03	0.0319334	25.6743	2160.26
89.8916	97.3118	0.04	0.0319334	25.6743	2161.2
89.9316	102.654	0.04	0.0319334	25.6743	2162.46
89.9716	94.5439	0.06	0.0319334	25.6743	2163.71
90.0316	99.4384	0.05	0.0319334	25.6743	2165.6
90.0816	147.118	0.05	0.0319334	25.6743	2167.18
90.1316	147.889	0.05	0.0319334	25.6743	2168.76
90.1816	106.833	0.07	0.0319334	25.6743	2170.34
90.2516	91.5588	0.05	0.0319334	25.6743	2172.57
90.3016	105.744	0.06	0.0319334	25.6743	2174.16
90.3616	75.3062	0.05	0.0319334	25.6743	2176.08
90.4116	53.364	0.05	0.0319334	25.6743	2177.68
90.4616	70.6908	0.05	0.0319334	25.6743	2179.29
90.5116	90.4306	0.05	0.0319334	25.6743	2180.9
90.5616	111.849	0.06	0.0319334	25.6743	2182.51
90.6216	109.312	0.05	0.0319334	25.6743	2184.46
90.6716	88.1418	0.05	0.0319334	25.6743	2186.09
90.7216	106.289	0.05	0.0319334	25.6743	2187.72
90.7716	107.378	0.05	0.0316942	24.7193	2189.36
90.8216	75.0911	0.06	0.0316942	24.7193	2191
90.8816	105.26	0.05	0.0316942	24.7193	2192.98
90.9316	57.555	0.05	0.0316942	24.7193	2194.63
90.9816	75.2755	0.05	0.0316942	24.7193	2196.29
91.0316	92.9301	0.05	0.0316942	24.7193	2197.95
91.0816	75.1833	0.06	0.0316942	24.7193	2199.62
91.1416	81.1369	0.05	0.0316942	24.7193	2201.62
91.1916	118.687	0.05	0.0316942	24.7193	2203.29
91.2416	126.671	0.05	0.0316942	24.7193	2204.97
91.2916	177.499	0.05	0.0316942	24.7193	2206.64
91.3416	140.583	0.05	0.0316942	24.7193	2208.32
91.3916	121.542	0.05	0.0316942	24.7193	2210
91.4416	119.649	0.05	0.0316942	24.7193	2211.68
91.4916	101.987	0.05	0.0316942	24.7193	2213.36
91.5416	75.214	0.05	0.0316942	24.7193	2215.04
91.5916	88.1724	0.06	0.0316942	24.7193	2216.72
91.6516	75.2755	0.05	0.0316942	24.7193	2218.73
91.7016	94.8787	0.05	0.0316942	24.7193	2220.41
91.7516	92.8082	0.05	0.0316942	24.7193	2222.08
91.8016	79.4509	0.05	0.0316942	24.7193	2223.76
91.8516	81.6578	0.05	0.0316942	24.7193	2225.43
91.9016	96.7646	0.05	0.0316942	24.7193	2227.1
91.9516	92.8082	0.05	0.0316942	24.7193	2228.76
92.0016	97.1598	0.05	0.0316942	24.7193	2230.43
92.0516	96.6126	0.06	0.0316942	24.7193	2232.08
92.1116	80.3094	0.05	0.0316942	24.7193	2234.07
92.1616	108.527	0.1	0.0316942	24.7193	2235.72
92.2616	70.3828	0.04	0.0316942	24.7193	2239
92.3016	81.5659	0.05	0.0316942	24.7193	2240.3
92.3516	102.169	0.05	0.0316942	24.7193	2241.93
92.4016	88.264	0.05	0.030082	26.6172	2243.55
92.4516	83.0665	0.05	0.030082	26.6172	2245.16
92.5016	126.102	0.04	0.030082	26.6172	2246.77
92.5416	93.8742	0.05	0.030082	26.6172	2248.05
92.5916	113.357	0.05	0.030082	26.6172	2249.65
92.6416	90.4306	0.05	0.030082	26.6172	2251.24
92.6916	90.6746	0.05	0.030082	26.6172	2252.82
92.7416	76.6273	0.05	0.030082	26.6172	2254.4
92.7916	72.2305	0.05	0.030082	26.6172	2255.97
92.8416	103.745	0.05	0.030082	26.6172	2257.54
92.8916	38.9843	0.04	0.030082	26.6172	2259.1
92.9316	48.8525	0.05	0.030082	26.6172	2260.35
92.9816	84.7495	0.05	0.030082	26.6172	2261.9
93.0316	86.3394	0.05	0.030082	26.6172	2263.45
93.0816	85.4835	0.05	0.030082	26.6172	2265
93.1316	101.927	0.04	0.030082	26.6172	2266.54
93.1716	61.6442	0.05	0.030082	26.6172	2267.77
93.2216	98.7095	0.06	0.030082	26.6172	2269.31
93.2816	74.015	0.07	0.030082	26.6172	2271.15
93.3516	73.3383	0.05	0.030082	26.6172	2273.29
93.4016	73.0922	0.04	0.030082	26.6172	2274.81
93.4416	88.325	0.04	0.030082	26.6172	2276.03
93.4816	77.7019	0.05	0.030082	26.6172	2277.25
93.5316	54.1407	0.04	0.030082	26.6172	2278.77
93.5716	75.5213	0.04	0.030082	26.6172	2279.99
93.6116	97.099	0.05	0.030082	26.6172	2281.2
93.6616	64.2729	0.04	0.030082	26.6172	2282.72
93.7016	56.9657	0.04	0.030082	26.6172	2283.93
93.7416	54.4824	0.04	0.030082	26.6172	2285.14
94.0917	110.158	0.04	0.032372	26.2466	2295.73
94.1317	112.874	0.04	0.032372	26.2466	2296.94
94.1717	130.651	0.09	0.032372	26.2466	2298.15
94.2617	123.643	0.04	0.032372	26.2466	2300.89
94.3017	76.6887	0.05	0.032372	26.2466	2302.1
94.3517	96.491	0.04	0.032372	26.2466	2303.62
94.3917	87.4088	0.06	0.032372	26.2466	2304.84
94.4517	140.558	0.04	0.032372	26.2466	2306.68
94.4917	103.326	0.05	0.032372	26.2466	2307.9
94.5417	116.446	0.04	0.032372	26.2466	2309.44
94.5817	117.144	0.05	0.032372	26.2466	2310.67
94.6317	90.7938	0.04	0.032372	26.2466	2312.21
94.6717	90.4591	0.09	0.032372	26.2466	2313.45
94.7617	103.437	0.04	0.032372	26.2466	2316.24
94.8017	115.895	0.05	0.032372	26.2466	2317.49
94.8517	123.488	0.04	0.032372	26.2466	2319.06
94.8917	95.6969	0.05	0.032372	26.2466	2320.32
94.9417	116.703	0.04	0.032372	26.2466	2321.89
94.9817	87.2579	0.05	0.032372	26.2466	2323.16
95.0317	105.654	0.05	0.032372	26.2466	2324.75
95.0817	112.327	0.05	0.032372	26.2466	2326.35
95.1317	100.441	0.04	0.032372	26.2466	2327.96
95.1717	53.4226	0.05	0.032372	26.2466	2329.25
95.2217	69.0003	0.04	0.032372	26.2466	2330.87
95.2617	102.476	0.05	0.032372	26.2466	2332.17
95.3117	89.6406	0.04	0.032372	26.2466	2333.81
95.3517	120.337	0.05	0.032372	26.2466	2335.13
95.4017	101.477	0.04	0.032372	26.2466	2336.78
95.4417	105.838	0.05	0.032372	26.2466	2338.12
95.4917	103.991	0.05	0.032372	26.2466	2339.79
95.5417	90.9053	0.05	0.032372	26.2466	2341.48
95.5917	130.8	0.04	0.032372	26.2466	2343.17
95.6317	120.997	0.04	0.032372	26.2466	2344.54
95.6717	113.284	0.04	0.032372	26.2466	2345.91
95.7117	98.7	0.05	0.0314705	22.9034	2347.3
95.7617	106.503	0.04	0.0314705	22.9034	2349.03
95.8017	137.868	0.04	0.0314705	22.9034	2350.43
95.8417	205.974	0.04	0.0314705	22.9034	2351.84
95.8817	173.296	0.05	0.0314705	22.9034	2353.25
95.9317	138.45	0.05	0.0314705	22.9034	2355.03
95.9817	77.0638	0.04	0.0314705	22.9034	2356.81
96.0217	88.0401	0.05	0.0314705	22.9034	2358.25
96.0717	97.9218	0.04	0.0314705	22.9034	2360.05
96.1117	117.585	0.04	0.0314705	22.9034	2361.49
96.1517	81.5135	0.05	0.0314705	22.9034	2362.94
96.2017	72.3795	0.04	0.0314705	22.9034	2364.76
96.2417	106.761	0.04	0.0314705	22.9034	2366.22
96.2817	120.74	0.05	0.0314705	22.9034	2367.69
96.3317	90.4219	0.04	0.0314705	22.9034	2369.52
96.3717	108.606	0.04	0.0314705	22.9034	2370.99
96.4117	100.404	0.04	0.0314705	22.9034	2372.47
96.4517	86.5873	0.05	0.0314705	22.9034	2373.94
96.5017	86.5128	0.04	0.0314705	22.9034	2375.79
96.5417	87.2207	0.04	0.0314705	22.9034	2377.27
96.5817	76.652	0.04	0.0314705	22.9034	2378.75
96.6217	93.1725	0.05	0.0314705	22.9034	2380.23
96.6717	88.4869	0.05	0.0314705	22.9034	2382.09
96.7217	90.3103	0.05	0.0314705	22.9034	2383.94
96.7717	109.896	0.05	0.0314705	22.9034	2385.79
96.9317	497.299	0.05	0.0314705	22.9034	2391.71
96.9817	319.928	0.05	0.0314705	22.9034	2393.56
97.0317	192.925	0.05	0.0314705	22.9034	2395.4
97.0817	125.867	0.05	0.0314705	22.9034	2397.24
97.1317	107.573	0.05	0.0314705	22.9034	2399.07
97.1817	109.048	0.05	0.0314705	22.9034	2400.9
97.2317	98.1812	0.05	0.0314705	22.9034	2402.72
97.2817	103.77	0.05	0.0314705	22.9034	2404.53
97.3317	135.393	0.05	0.0314705	22.9034	2406.34
97.3817	77.7749	0.05	0.0274497	24.0138	2408.14
97.4317	70.2024	0.05	0.0274497	24.0138	2409.93
97.4817	94.8805	0.07	0.0274497	24.0138	2411.71
97.5517	93.581	0.05	0.0274497	24.0138	2414.2
97.6017	91.7233	0.05	0.0274497	24.0138	2415.96
97.6517	101.773	0.07	0.0274497	24.0138	2417.72
97.7217	106.614	0.05	0.0274497	24.0138	2420.18
97.7717	110.965	0.05	0.0274497	24.0138	2421.92
97.8217	114.314	0.05	0.0274497	24.0138	2423.66
97.8717	123.671	0.05	0.0274497	24.0138	2425.4
97.9217	105.432	0.05	0.0274497	24.0138	2427.13
97.9717	91.6118	0.05	0.0274497	24.0138	2428.85
98.0217	98.7	0.04	0.0274497	24.0138	2430.58
98.0617	103.622	0.05	0.0274497	24.0138	2431.95
98.1117	147.232	0.1	0.0274497	24.0138	2433.67
98.2117	142.483	0.05	0.0274497	24.0138	2437.09
98.2617	108.458	0.05	0.0274497	24.0138	2438.8
98.3117	96.1421	0.05	0.0274497	24.0138	2440.5
98.3617	89.2685	0.05	0.0274497	24.0138	2442.21
98.4117	98.1442	0.05	0.0274497	24.0138	2443.91
98.4617	118.099	0.05	0.0274497	24.0138	2445.61
98.5117	138.232	0.05	0.0274497	24.0138	2447.32
98.5617	175.656	0.04	0.0274497	24.0138	2449.02
98.6017	136.23	0.07	0.0274497	24.0138	2450.38
98.6717	115.637	0.04	0.0274497	24.0138	2452.76
98.7117	120.52	0.05	0.0274497	24.0138	2454.12
98.7617	131.894	0.05	0.0274497	24.0138	2455.83
98.9017	117.862	0.04	0.0274497	24.0138	2460.61
98.9417	139.208	0.0401	0.0274497	24.0138	2461.97
98.9818	140.035	0.04	0.0274497	24.0138	2463.34
99.0218	96.0577	0.04	0.0289626	24.415	2464.72
99.0618	96.2297	0.04	0.0289626	24.415	2466.09
99.1018	84.5132	0.04	0.0289626	24.415	2467.47
99.1418	87.6817	0.04	0.0289626	24.415	2468.84
99.1818	85.5994	0.04	0.0289626	24.415	2470.22
99.2218	72.537	0.04	0.0289626	24.415	2471.6
99.2618	94.6374	0.04	0.0289626	24.415	2472.99
99.3018	63.7545	0.04	0.0289626	24.415	2474.37
99.3418	72.9765	0.0299	0.0289626	24.415	2475.75
99.3717	63.9761	0.0401	0.0289626	24.415	2476.79
99.4118	70.6454	0.04	0.0289626	24.415	2478.18
99.4518	69.7644	0.04	0.0289626	24.415	2479.56
99.4918	84.122	0.04	0.0289626	24.415	2480.95
99.5318	87.2916	0.04	0.0289626	24.415	2482.34
99.5718	97.7338	0.04	0.0289626	24.415	2483.73
99.6118	67.5147	0.04	0.0289626	24.415	2485.11
99.6518	64.5076	0.04	0.0289626	24.415	2486.5
99.6918	109.693	0.04	0.0289626	24.415	2487.89
99.7318	104.797	0.04	0.0289626	24.415	2489.28
99.7718	110.627	0.04	0.0289626	24.415	2490.67
99.8118	123.709	0.04	0.0289626	24.415	2492.05
99.8518	155.765	0.03	0.0289626	24.415	2493.44
99.8818	132.9	0.07	0.0289626	24.415	2494.48
99.9518	76.792	0.04	0.0289626	24.415	2496.9
99.9918	51.9903	0.0402	0.0289626	24.415	2498.29
100.032	90.452	0.03	0.0289626	24.415	2499.67
100.062	93.4309	0.09	0.0289626	24.415	2500.7
100.152	102.191	0.03	0.0289626	24.415	2503.81
100.182	71.6576	0.04	0.0289626	24.415	2504.84
100.222	63.5773	0.03	0.0289626	24.415	2506.22
100.252	71.0416	0.04	0.0289626	24.415	2507.25
100.292	93.4309	0.04	0.0289626	24.415	2508.62
100.332	99.1071	0.03	0.0289626	24.415	2509.99
100.362	101.635	0.04	0.0289626	24.415	2511.01
100.402	79.5466	0.03	0.0289626	24.415	2512.38
100.432	94.4651	0.04	0.0289626	24.415	2513.4
100.472	79.3282	0.03	0.0289626	24.415	2514.77
100.502	89.5438	0.04	0.0289626	24.415	2515.79
100.542	72.4491	0.03	0.0289626	24.415	2517.14
100.572	80.5941	0.04	0.0289626	24.415	2518.16
100.612	81.8149	0.03	0.0289626	24.415	2519.51
100.642	84.1654	0.04	0.0289626	24.415	2520.52
100.682	81.4662	0.03	0.029034	25.9128	2521.87
100.712	93.474	0.04	0.029034	25.9128	2522.88
100.752	85.5559	0.04	0.029034	25.9128	2524.22
100.792	93.9912	0.03	0.029034	25.9128	2525.56
100.822	89.1543	0.04	0.029034	25.9128	2526.56
100.862	91.5323	0.03	0.029034	25.9128	2527.89
100.892	77.9297	0.04	0.029034	25.9128	2528.89
100.932	83.7305	0.03	0.029034	25.9128	2530.22
100.962	81.9456	0.08	0.029034	25.9128	2531.21
101.042	56.5957	0.04	0.029034	25.9128	2533.86
101.082	76.7044	0.04	0.029034	25.9128	2535.18
101.122	62.7792	0.04	0.029034	25.9128	2536.5
101.162	86.0769	0.04	0.029034	25.9128	2537.81
101.202	68.9269	0.04	0.029034	25.9128	2539.13
101.242	77.8859	0.03	0.029034	25.9128	2540.44
101.272	79.3282	0.04	0.029034	25.9128	2541.42
101.312	79.4156	0.05	0.029034	25.9128	2542.73
101.362	116.343	0.04	0.029034	25.9128	2544.36
101.402	92.3094	0.03	0.029034	25.9128	2545.66
101.432	70.6454	0.04	0.029034	25.9128	2546.64
101.472	83.687	0.04	0.029034	25.9128	2547.94
101.512	83.774	0.04	0.029034	25.9128	2549.24
101.552	85.8165	0.04	0.029034	25.9128	2550.54
101.592	131.276	0.04	0.029034	25.9128	2551.84
101.632	130.568	0.03	0.029034	25.9128	2553.14
101.662	113.171	0.04	0.029034	25.9128	2554.11
101.702	106.758	0.04	0.029034	25.9128	2555.41
101.742	98.5494	0.04	0.029034	25.9128	2556.7
101.782	87.0748	0.04	0.029034	25.9128	2557.99
101.822	78.3232	0.04	0.029034	25.9128	2559.29
101.862	81.0302	0.03	0.029034	25.9128	2560.58
101.892	81.0302	0.04	0.029034	25.9128	2561.55
101.932	82.6425	0.04	0.029034	25.9128	2562.84
101.972	91.1435	0.04	0.029034	25.9128	2564.13
102.012	103.601	0.04	0.029034	25.9128	2565.42
102.052	89.0245	0.04	0.029034	25.9128	2566.72
102.092	78.935	0.03	0.029034	25.9128	2568.01
102.122	55.8816	0.04	0.029034	25.9128	2568.98
102.162	53.6022	0.03	0.029034	25.9128	2570.27
102.192	74.864	0.04	0.029034	25.9128	2571.24
102.232	88.4616	0.04	0.029034	25.9128	2572.53
102.272	81.4662	0.04	0.029034	25.9128	2573.82
102.312	113.129	0.03	0.0305952	26.2596	2575.11
102.342	81.6842	0.04	0.0305952	26.2596	2576.08
102.382	84.9913	0.04	0.0305952	26.2596	2577.38
102.422	73.1522	0.04	0.0305952	26.2596	2578.67
102.462	81.1174	0.03	0.0305952	26.2596	2579.97
102.492	68.6622	0.04	0.0305952	26.2596	2580.94
102.532	75.8284	0.04	0.0305952	26.2596	2582.23
102.572	64.2862	0.04	0.0305952	26.2596	2583.53
102.612	74.5131	0.03	0.0305952	26.2596	2584.82
102.642	62.158	0.04	0.0305952	26.2596	2585.79
102.682	48.3544	0.04	0.0305952	26.2596	2587.09
102.722	119.042	0.03	0.0305952	26.2596	2588.39
102.752	93.9912	0.04	0.0305952	26.2596	2589.36
102.792	77.0109	0.04	0.0305952	26.2596	2590.65
102.832	86.9447	0.05	0.0305952	26.2596	2591.95
102.882	81.9456	0.03	0.0305952	26.2596	2593.57
102.912	96.9175	0.04	0.0305952	26.2596	2594.54
102.952	69.7204	0.04	0.0305952	26.2596	2595.84
102.992	59.0022	0.04	0.0305952	26.2596	2597.13
103.032	72.4931	0.03	0.0305952	26.2596	2598.43
103.062	74.7763	0.04	0.0305952	26.2596	2599.4
103.102	85.5559	0.04	0.0305952	26.2596	2600.69
103.142	81.6406	0.04	0.0305952	26.2596	2601.99
103.182	98.721	0.04	0.0305952	26.2596	2603.28
103.222	93.3016	0.03	0.0305952	26.2596	2604.57
103.252	70.4693	0.03	0.0305952	26.2596	2605.54
103.282	65.5699	0.04	0.0305952	26.2596	2606.51
103.322	77.1422	0.03	0.0305952	26.2596	2607.8
103.352	74.9079	0.03	0.0305952	26.2596	2608.77
103.382	69.8526	0.04	0.0305952	26.2596	2609.74
103.422	93.5171	0.03	0.0305952	26.2596	2611.03
103.452	95.7565	0.03	0.0305952	26.2596	2612
103.482	92.3957	0.03	0.0305952	26.2596	2612.96
103.512	104.455	0.04	0.0305952	26.2596	2613.93
103.552	103.986	0.03	0.0305952	26.2596	2615.22
103.582	86.6844	0.03	0.0305952	26.2596	2616.18
103.612	92.3094	0.04	0.0305952	26.2596	2617.15
103.652	90.3223	0.03	0.0305952	26.2596	2618.43
103.682	127.771	0.03	0.0305952	26.2596	2619.39
103.712	109.183	0.04	0.0305952	26.2596	2620.36
103.752	105.181	0.03	0.0305952	26.2596	2621.64
103.782	110.839	0.03	0.0305952	26.2596	2622.6
103.812	101.934	0.03	0.0305952	26.2596	2623.56
103.842	70.8655	0.04	0.0305952	26.2596	2624.52
103.882	70.3372	0.04	0.0305952	26.2596	2625.8
103.922	91.1003	0.03	0.0305952	26.2596	2627.07
103.952	85.6428	0.04	0.0309917	26.8477	2628.03
103.992	109.268	0.03	0.0309917	26.8477	2629.3
104.022	121.945	0.03	0.0309917	26.8477	2630.26
104.052	119.211	0.04	0.0309917	26.8477	2631.21
104.092	97.562	0.03	0.0309917	26.8477	2632.48
104.122	101.207	0.03	0.0309917	26.8477	2633.44
104.152	90.7114	0.03	0.0309917	26.8477	2634.39
104.182	86.9447	0.04	0.0309917	26.8477	2635.34
104.222	81.6406	0.03	0.0309917	26.8477	2636.61
104.252	92.9997	0.03	0.0309917	26.8477	2637.56
104.282	100.864	0.07	0.0309917	26.8477	2638.51
104.352	61.7585	0.04	0.0309917	26.8477	2640.72
104.392	48.9388	0.03	0.0309917	26.8477	2641.99
104.422	61.6253	0.04	0.0309917	26.8477	2642.94
104.462	60.2479	0.03	0.0309917	26.8477	2644.2
104.492	74.9956	0.04	0.0309917	26.8477	2645.15
104.532	73.6792	0.03	0.0309917	26.8477	2646.42
104.562	93.3878	0.04	0.0309917	26.8477	2647.36
104.602	93.6464	0.03	0.0309917	26.8477	2648.63
104.632	83.9915	0.04	0.0309917	26.8477	2649.58
104.672	72.2293	0.03	0.0309917	26.8477	2650.84
104.702	70.2491	0.04	0.0309917	26.8477	2651.79
104.742	65.1717	0.04	0.0309917	26.8477	2653.05
104.782	81.379	0.03	0.0309917	26.8477	2654.32
104.812	57.0418	0.04	0.0309917	26.8477	2655.27
104.852	51.004	0.03	0.0309917	26.8477	2656.53
104.882	43.8933	0.04	0.0309917	26.8477	2657.48
104.922	64.7733	0.03	0.0309917	26.8477	2658.75
104.952	68.5299	0.04	0.0309917	26.8477	2659.7
104.992	81.6842	0.03	0.0309917	26.8477	2660.97
105.022	68.5299	0.04	0.0309917	26.8477	2661.92
105.062	59.6252	0.04	0.0309917	26.8477	2663.19
105.102	65.6142	0.04	0.0309917	26.8477	2664.46
105.142	73.8548	0.03	0.0309917	26.8477	2665.74
105.172	75.8723	0.04	0.0309917	26.8477	2666.69
105.212	67.5589	0.03	0.0309917	26.8477	2667.97
105.242	66.3217	0.04	0.0309917	26.8477	2668.93
105.282	66.4543	0.04	0.0309917	26.8477	2670.2
105.322	76.4417	0.03	0.0309917	26.8477	2671.48
105.352	89.7169	0.04	0.0309917	26.8477	2672.44
105.392	71.9655	0.03	0.0309917	26.8477	2673.73
105.422	81.8585	0.04	0.0309917	26.8477	2674.69
105.462	97.7338	0.03	0.0309917	26.8477	2675.97
105.492	79.6339	0.04	0.0309917	26.8477	2676.94
105.532	81.6406	0.03	0.0309917	26.8477	2678.23
105.562	94.2067	0.04	0.0309917	26.8477	2679.2
105.602	91.5755	0.03	0.0314525	26.0677	2680.49
105.632	98.4636	0.04	0.0314525	26.0677	2681.46
105.672	81.7713	0.03	0.0314525	26.0677	2682.76
105.702	81.0738	0.04	0.0314525	26.0677	2683.73
105.742	80.2887	0.03	0.0314525	26.0677	2685.03
105.772	46.4641	0.04	0.0314525	26.0677	2686.01
105.812	84.6436	0.03	0.0314525	26.0677	2687.32
105.842	88.9379	0.04	0.0314525	26.0677	2688.29
105.882	86.4675	0.03	0.0314525	26.0677	2689.6
105.912	67.4264	0.04	0.0314525	26.0677	2690.58
105.952	73.6353	0.03	0.0314525	26.0677	2691.9
105.982	85.2954	0.04	0.0314525	26.0677	2692.88
106.022	111.476	0.03	0.0314525	26.0677	2694.19
106.052	121.777	0.04	0.0314525	26.0677	2695.18
106.092	126.097	0.03	0.0314525	26.0677	2696.5
106.122	117.398	0.04	0.0314525	26.0677	2697.48
106.162	118.916	0.03	0.0314525	26.0677	2698.8
106.192	87.1615	0.04	0.0314525	26.0677	2699.79
106.232	85.3388	0.03	0.0314525	26.0677	2701.11
106.262	96.8745	0.04	0.0314525	26.0677	2702.1
106.302	148.112	0.03	0.0314525	26.0677	2703.42
106.332	85.9901	0.03	0.0314525	26.0677	2704.42
106.442	111.561	0.03	0.0314525	26.0677	2708.06
106.472	87.2612	0.06	0.0314525	26.0677	2709.05
106.532	75.2937	0.04	0.0314525	26.0677	2711.04
106.572	86.4241	0.03	0.0314525	26.0677	2712.37
106.602	89.5438	0.04	0.0314525	26.0677	2713.36
106.642	61.6253	0.03	0.0314525	26.0677	2714.69
106.672	51.7662	0.04	0.0314525	26.0677	2715.68
106.712	92.2231	0.03	0.0314525	26.0677	2717.01
106.742	75.0833	0.04	0.0314525	26.0677	2718
106.782	87.1182	0.03	0.0314525	26.0677	2719.33
106.812	78.7603	0.04	0.0314525	26.0677	2720.33
106.852	89.0678	0.03	0.0314525	26.0677	2721.65
106.882	102.276	0.04	0.0314525	26.0677	2722.65
106.922	101.036	0.03	0.0314525	26.0677	2723.97
106.952	98.4207	0.04	0.0314525	26.0677	2724.97
106.992	127.687	0.03	0.0314525	26.0677	2726.29
107.022	83.426	0.06	0.0314525	26.0677	2727.29
107.082	88.2017	0.04	0.0314525	26.0677	2729.27
107.122	75.3463	0.03	0.0314525	26.0677	2730.6
107.152	69.4559	0.04	0.0314525	26.0677	2731.59
107.192	68.0886	0.03	0.0314525	26.0677	2732.91
107.222	78.7166	0.04	0.0314525	26.0677	2733.9
107.262	61.9361	0.03	0.0303309	26.6419	2735.22
107.292	92.9565	0.04	0.0303309	26.6419	2736.21
107.332	93.8619	0.03	0.0303309	26.6419	2737.53
107.362	78.192	0.04	0.0303309	26.6419	2738.51
107.402	69.2796	0.03	0.0303309	26.6419	2739.83
107.432	57.9779	0.04	0.0303309	26.6419	2740.82
107.472	70.3812	0.03	0.0303309	26.6419	2742.13
107.502	69.4559	0.04	0.0303309	26.6419	2743.11
107.542	89.2842	0.03	0.0303309	26.6419	2744.43
107.572	82.6425	0.05	0.0303309	26.6419	2745.41
107.622	55.3661	0.04	0.0303309	26.6419	2747.04
107.662	70.9156	0.03	0.0303309	26.6419	2748.35
107.692	85.81	0.04	0.0303309	26.6419	2749.33
107.732	93.5489	0.03	0.0303309	26.6419	2750.64
107.762	104.228	0.04	0.0303309	26.6419	2751.62
107.802	107.051	0.04	0.0303309	26.6419	2752.92
107.842	90.4738	0.03	0.0303309	26.6419	2754.22
107.872	104.516	0.04	0.0303309	26.6419	2755.2
107.912	74.7333	0.03	0.0303309	26.6419	2756.49
107.942	96.8526	0.04	0.0303309	26.6419	2757.47
107.982	80.2201	0.04	0.0303309	26.6419	2758.76
108.022	72.9276	0.03	0.0303309	26.6419	2760.06
108.052	71.0667	0.05	0.0303309	26.6419	2761.03
108.102	69.7054	0.04	0.0303309	26.6419	2762.65
108.142	91.5981	0.03	0.0303309	26.6419	2763.94
108.172	79.8723	0.04	0.0303309	26.6419	2764.9
108.212	112.948	0.03	0.0303309	26.6419	2766.19
108.242	115.453	0.04	0.0303309	26.6419	2767.16
108.282	86.4009	0.04	0.0303309	26.6419	2768.44
108.322	79.6238	0.04	0.0303309	26.6419	2769.73
108.362	67.8859	0.04	0.0303309	26.6419	2771.01
108.402	66.8221	0.03	0.0303309	26.6419	2772.29
108.432	81.6592	0.04	0.0303309	26.6419	2773.25
108.472	100.767	0.04	0.0303309	26.6419	2774.52
108.512	98.5952	0.03	0.0303309	26.6419	2775.8
108.542	97.5792	0.04	0.0303309	26.6419	2776.76
108.582	83.7872	0.03	0.0303309	26.6419	2778.03
108.612	70.2099	0.04	0.0303309	26.6419	2778.98
108.652	90.5716	0.04	0.0303309	26.6419	2780.25
108.692	77.4325	0.06	0.0303309	26.6419	2781.52
108.752	82.1547	0.03	0.0303309	26.6419	2783.42
108.782	99.3682	0.04	0.0303309	26.6419	2784.37
108.822	80.0711	0.04	0.0303309	26.6419	2785.63
108.862	92.4279	0.04	0.0303309	26.6419	2786.89
108.902	88.6122	0.03	0.0309801	27.9269	2788.15
108.932	82.5013	0.04	0.0309801	27.9269	2789.09
108.972	78.28	0.04	0.0309801	27.9269	2790.35
109.012	77.981	0.03	0.0309801	27.9269	2791.6
109.042	77.1331	0.04	0.0309801	27.9269	2792.54
109.082	74.9837	0.04	0.0309801	27.9269	2793.79
109.122	65.2995	0.03	0.0309801	27.9269	2795.04
109.152	96.998	0.04	0.0309801	27.9269	2795.98
109.192	89.2006	0.04	0.0309801	27.9269	2797.22
109.232	78.7282	0.03	0.0309801	27.9269	2798.46
109.262	75.0838	0.04	0.0309801	27.9269	2799.4
109.302	93.0618	0.04	0.0309801	27.9269	2800.64
109.342	62.6009	0.03	0.0309801	27.9269	2801.88
109.372	89.2496	0.04	0.0309801	27.9269	2802.8
109.412	96.0282	0.04	0.0309801	27.9269	2804.04
109.452	78.3796	0.04	0.0309801	27.9269	2805.28
109.492	74.4327	0.03	0.0309801	27.9269	2806.51
109.522	89.8375	0.04	0.0309801	27.9269	2807.43
109.562	87.2863	0.04	0.0309801	27.9269	2808.66
109.602	93.7924	0.03	0.0309801	27.9269	2809.89
109.632	74.3826	0.04	0.0309801	27.9269	2810.81
109.672	92.6718	0.04	0.0309801	27.9269	2812.04
109.712	99.9957	0.03	0.0309801	27.9269	2813.26
109.742	69.0994	0.04	0.0309801	27.9269	2814.18
109.782	54.7466	0.05	0.0309801	27.9269	2815.4
109.832	63.6715	0.04	0.0309801	27.9269	2816.93
109.872	68.1389	0.03	0.0309801	27.9269	2818.14
109.902	73.3293	0.05	0.0309801	27.9269	2819.06
109.952	69.2005	0.03	0.0309801	27.9269	2820.58
109.982	80.4685	0.04	0.0309801	27.9269	2821.49
110.022	78.6784	0.04	0.0309801	27.9269	2822.7
110.062	70.714	0.04	0.0309801	27.9269	2823.91
110.102	75.6842	0.03	0.0309801	27.9269	2825.12
110.132	82.8972	0.04	0.0309801	27.9269	2826.03
110.172	74.1319	0.04	0.0309801	27.9269	2827.24
110.212	88.7593	0.03	0.0309801	27.9269	2828.44
110.242	99.8027	0.04	0.0309801	27.9269	2829.35
110.282	69.5034	0.04	0.0309801	27.9269	2830.55
110.322	64.3334	0.04	0.0309801	27.9269	2831.76
110.362	77.2329	0.04	0.0309801	27.9269	2832.96
110.402	120.998	0.03	0.0309801	27.9269	2834.16
110.432	101.201	0.04	0.0309801	27.9269	2835.06
110.472	73.6304	0.04	0.0309801	27.9269	2836.26
110.512	75.1338	0.03	0.0309801	27.9269	2837.45
110.542	75.5842	0.04	0.0309801	27.9269	2838.35
110.582	82.5508	0.04	0.0326733	28.7911	2839.55
110.622	72.3749	0.03	0.0326733	28.7911	2840.74
110.652	65.9598	0.04	0.0326733	28.7911	2841.64
110.692	75.7843	0.04	0.0326733	28.7911	2842.83
110.732	65.8075	0.03	0.0326733	28.7911	2844.02
110.762	82.3528	0.04	0.0326733	28.7911	2844.91
110.802	101.442	0.04	0.0326733	28.7911	2846.11
110.842	80.1705	0.03	0.0326733	28.7911	2847.3
110.872	72.7267	0.05	0.0326733	28.7911	2848.19
110.922	75.7843	0.03	0.0326733	28.7911	2849.68
110.952	73.9314	0.04	0.0326733	28.7911	2850.57
110.992	76.5839	0.03	0.0326733	28.7911	2851.76
111.022	72.1235	0.03	0.0326733	28.7911	2852.66
111.052	96.2708	0.08	0.0326733	28.7911	2853.55
111.132	78.8278	0.04	0.0326733	28.7911	2855.94
111.172	77.8314	0.03	0.0326733	28.7911	2857.13
111.202	58.3519	0.04	0.0326733	28.7911	2858.03
111.242	75.7843	0.03	0.0326733	28.7911	2859.22
111.272	69.251	0.03	0.0326733	28.7911	2860.12
111.302	75.1839	0.04	0.0326733	28.7911	2861.02
111.342	79.2756	0.03	0.0326733	28.7911	2862.22
111.372	78.6286	0.04	0.0326733	28.7911	2863.12
111.412	95.5914	0.03	0.0326733	28.7911	2864.32
111.442	90.0823	0.03	0.0326733	28.7911	2865.23
111.472	64.5878	0.04	0.0326733	28.7911	2866.13
111.512	74.8835	0.04	0.0326733	28.7911	2867.34
111.552	72.2241	0.03	0.0326733	28.7911	2868.55
111.582	82.6003	0.04	0.0326733	28.7911	2869.46
111.622	66.112	0.03	0.0326733	28.7911	2870.67
111.652	65.2995	0.04	0.0326733	28.7911	2871.58
111.692	89.6906	0.03	0.0326733	28.7911	2872.8
111.722	85.2186	0.03	0.0326733	28.7911	2873.72
111.752	70.1594	0.04	0.0326733	28.7911	2874.64
111.792	84.7747	0.03	0.0326733	28.7911	2875.86
111.822	77.5821	0.04	0.0326733	28.7911	2876.78
111.862	64.3334	0.03	0.0326733	28.7911	2878.02
111.892	107.815	0.03	0.0326733	28.7911	2878.94
111.922	89.8865	0.04	0.0326733	28.7911	2879.87
111.962	88.5631	0.03	0.0326733	28.7911	2881.11
111.992	95.1542	0.04	0.0326733	28.7911	2882.04
112.032	73.7809	0.04	0.0326733	28.7911	2883.29
112.072	71.6205	0.03	0.0326733	28.7911	2884.54
112.102	103.317	0.04	0.0326733	28.7911	2885.48
112.142	73.8812	0.03	0.0326733	28.7911	2886.74
112.172	69.6549	0.04	0.0326733	28.7911	2887.69
112.212	67.2276	0.03	0.0330066	26.5051	2888.96
112.242	71.4695	0.04	0.0330066	26.5051	2889.91
112.282	88.7103	0.03	0.0330066	26.5051	2891.19
112.312	69.9072	0.04	0.0330066	26.5051	2892.14
112.352	97.1434	0.03	0.0330066	26.5051	2893.43
112.382	89.8375	0.04	0.0330066	26.5051	2894.39
112.422	86.2533	0.03	0.0330066	26.5051	2895.68
112.452	92.6718	0.04	0.0330066	26.5051	2896.65
112.492	99.0785	0.03	0.0330066	26.5051	2897.94
112.522	93.5002	0.04	0.0330066	26.5051	2898.92
112.562	87.2371	0.04	0.0330066	26.5051	2900.22
112.602	87.6303	0.03	0.0330066	26.5051	2901.52
112.632	78.0308	0.04	0.0330066	26.5051	2902.51
112.672	84.9227	0.03	0.0330066	26.5051	2903.82
112.702	94.6195	0.04	0.0330066	26.5051	2904.8
112.742	86.9913	0.03	0.0330066	26.5051	2906.11
112.772	82.4518	0.04	0.0330066	26.5051	2907.1
112.812	87.6303	0.03	0.0330066	26.5051	2908.42
112.842	91.5004	0.04	0.0330066	26.5051	2909.41
112.882	93.0618	0.03	0.0330066	26.5051	2910.73
112.912	83.639	0.04	0.0330066	26.5051	2911.73
112.952	82.5013	0.03	0.0330066	26.5051	2913.05
112.982	91.3538	0.04	0.0330066	26.5051	2914.05
113.022	81.0641	0.03	0.0330066	26.5051	2915.37
113.052	102.308	0.04	0.0330066	26.5051	2916.37
113.092	53.7128	0.03	0.0330066	26.5051	2917.7
113.122	58.4547	0.03	0.0330066	26.5051	2918.7
113.152	91.9887	0.04	0.0330066	26.5051	2919.7
113.192	113.09	0.03	0.0330066	26.5051	2921.03
113.222	87.4337	0.04	0.0330066	26.5051	2922.03
113.262	87.3354	0.03	0.0330066	26.5051	2923.36
113.292	88.3668	0.04	0.0330066	26.5051	2924.36
113.332	72.1235	0.03	0.0330066	26.5051	2925.7
113.362	76.7837	0.04	0.0330066	26.5051	2926.7
113.402	77.632	0.03	0.0330066	26.5051	2928.03
113.432	81.7583	0.04	0.0330066	26.5051	2929.03
113.472	86.0563	0.03	0.0330066	26.5051	2930.36
113.502	87.532	0.04	0.0330066	26.5051	2931.36
113.542	74.8835	0.03	0.0330066	26.5051	2932.69
113.572	70.3612	0.04	0.0330066	26.5051	2933.69
113.612	81.5105	0.03	0.0330066	26.5051	2935.02
113.642	98.9818	0.04	0.0330066	26.5051	2936.02
113.682	106.526	0.04	0.0330066	26.5051	2937.35
113.722	112.427	0.03	0.0330066	26.5051	2938.67
113.752	98.2083	0.04	0.0330066	26.5051	2939.67
113.792	80.816	0.03	0.0330066	26.5051	2940.99
113.822	77.2329	0.03	0.0330066	26.5051	2941.98
113.852	105.426	0.04	0.03037	26.4016	2942.97
113.892	86.2533	0.03	0.03037	26.4016	2944.29
113.922	105.569	0.04	0.03037	26.4016	2945.28
113.962	120.483	0.04	0.03037	26.4016	2946.59
114.002	123.755	0.03	0.03037	26.4016	2947.9
[truncated: 82,317 more rows]

## Sheet: Details
Column	Variable	Units	Info	Source
A	Depth	m	Must be +ve, <3100 m	Florence dataset
B	Sulfate	ug/L	Must be +ve, always<3000	Florence dataset
C	Sample thickness	m	Must be +ve	Florence dataset
D	Annual layer thickness	m	Must be +ve	AICC2012 interpolated
E	Snow acc rate	kg m-2 a-1	Must be +ve	AICC2012 interpolated
F	Age	Years before 1950	All +ve, max value here <204000	AICC2012 interpolated
