# Supplementary material for: Frequency of large volcanic eruptions over the past 200,000 years
Source: Copernicus journal article supplement (doi:10.5194/cp-2022-69), 2022-09-09
Supplement: Supplementary file 3 [file SupplementaryData_S_isotopes.xlsx]

## Sheet: Table
Peak Number	Sample label	Top depth (m)	Bottom depth (m)	Age (ka)	SO4 concentration (ppb)	Sample mass (g)	d34S (‰)	Maximum magnitude D33S (‰)	Stratospheric?
1	EDC500	312.93	312.95	10.1534	343.36	6.082	15.8723	0.916017	Yes
2	EDC513	313.78	313.8	10.1816	201.376	9.53028	7.12135	-0.0893172	No
3	EDC009	450.74	450.76	16.4539	228.001	8.46297	14.4351	0.416968	Yes
4	EDC026	451.71	451.72	16.5164	639.417	3.1044	-10.349	-1.06319	Yes
5	EDC052	454.22	454.23	16.6794	1122.45	1.77226	11.8988	0.96417	Yes
6	EDC421	579.19	579.21	27.2062	458.745	4.70999	11.2985	0.638361	Yes
7	EDC531	587.83	587.85	28.0432	261.25	7.44396	7.10544	0.252781	Yes
8	EDC440	607.2	607.22	29.7369	545.719	3.30308	-4.30926	-0.785841	Yes
9	EDC456	616.31	616.33	30.564	584.69	3.43569	20.8069	1.34755	Yes
10	EDC083	632.72	632.73	32.048	1826.21	1.02147	-5.2149	-0.381852	Yes
11	EDC468	1004.87	1004.89	65.6984	603.2	3.40688	7.96	0.11	No
12	EDC110	1019.46	1019.47	67.4506	1763.2	1.12	18.0677	1.69021	Yes
13	EDC134	1078.98	1079	73.6673	506.857	4.47207	-21.4209	-2.94109	Yes
14	EDC147	1079.72	1079.73	73.7467	747.529	2.83946	-13.4428	-2.42009	Yes
15	EDC171	1081.27	1081.28	73.9117	1087.26	1.67534	0.318901	-0.951208	Yes
16	EDC540	1082.28	1082.32	74.019	400	4.89421	3.64086	-0.115281	No
17	EDC201	1140.62	1140.63	79.517	1022.19	1.9	29.6222	2.992	Yes
18	EDC484	1178.99	1179.01	82.5724	496.016	4.04447	17.9171	1.45876	Yes
19	EDC223	1206.61	1206.62	84.6285	876.496	2.39849	4.25966	0.585435	Yes
20	EDC241	1238.74	1238.75	87.3176	755.856	2.05025	9.0162	0.822901	Yes
21	EDC548	1334.12	1334.16	96.1255	211.584	9.31379	12.2809	0.313811	Yes

## Sheet: Figure
0	0.14	-0.14
100	0.14	-0.14
