# Supplementary material for: Frequency of large volcanic eruptions over the past 200,000 years
Source: Copernicus journal article supplement (doi:10.5194/cp-2022-69), 2022-09-09
Supplement: Supplementary file [file cp-2022-69-AC2-supplement.pdf]

Review in normal type, response in *italic*:

The authors present a new analysis of the EPICA Dome C (EDC) sulfate record, and add new sulfur isotope data, to provide a critical assessment of volcanic eruption frequency over the past 200,000 years. Despite the obvious importance of such an analysis to our understanding of the climate forcing implications of medium- and large-scale volcanic eruptions, and any possible climate-volcanic feedbacks, analyses of volcanic frequency over long timescales are sparse. There are good reasons for this, as the authors note in the introduction. The EDC record is well-suited to address the problem, and the authors have a long role in producing and interpreting sulfate data from EDC. The base set of parameters that guide their analysis might be debated, but nonetheless this is a valuable contribution and certainly relevant for Climate of the Past. My comments are mainly directed at providing better clarity and insight for the reader, which I hope the authors will consider during revisions.

*Thank you for this. We appreciate the aim for more clarity.*

Line 48: “Antarctica has rather few local eruptions.” – that is strongly location-dependent. Probably true for EDC, but certainly not for coastal regions. Please clarify the sentence.

*We agree that our wording was imprecise. We intended to refer to the frequency of large eruptions leading to a major S loading. We have taken the opportunity to expand our explanation. Proposed wording:*

*“For the region around Antarctica, there are active volcanoes in New Zealand, the Andes, the South Sandwich and South Shetland Islands, and within the continent in Marie Byrd Land and around McMurdo Sound. However the frequency of large eruptions from these areas is expected to be low (notwithstanding an unusual event at the last deglaciation (McConnell et al., 2017)), and the local sources within the continent are far from Dome C. The record of eruptions is therefore likely dominated by those that have reached the stratosphere and have a global climate effect. “*

Line 64: “Antarctic ice cores will record some eruptions which did not reach the stratosphere but are smaller eruptions of more regional origin” – As written, this seems somewhat inconsistent with the text in line 48. Please provide some clarity here – all Antarctic ice cores, some Antarctic ice cores, and if so which ones, are more or less affected by regional eruptions?

*We don't really see an inconsistency here. There will be few local eruptions but still some. We propose a slight revision:*

*“Thirdly, despite the lower frequency of local eruptions, Antarctic ice cores will still record some of these minor eruptions”*

Line 65 “These can in principle be filtered using sulfur isotope analysis..” – I agree in principle, but not in practice – at least not yet as far as I understand – we cannot hope to distinguish every eruption with S isotopes. Please add some wording to define the boundaries as they currently stand.

*I am not sure what the reviewer intends here. In principle every eruption where a significant proportion of the S reaches the stratosphere will undergo mass independent fractionation, and so analysis at high enough depth resolution should identify it. No change planned.*

Line 70: “good depth resolution” – please be more specific – what constitutes good resolution in this core and time interval of interest?

*Resolution that gives at least 5-10 samples across a peak is required. At EDC this then means that better than 5 cm is needed (because of diffusion this applies throughout the 200 kyr period).*

*Proposed text:*

*“resolution (at EDC resolution of better than 5 cm is optimal),”*

Lines 91-92: An expanded description of the author’s goals, and contribution of the study, would be helpful here. For instance, are they planning to providing any regional or larger context through comparison with other studies? How do the sulfur isotope factor in, etc.? The two lines of course are accurate, but limited in providing the reader with a broader perspective of what the author’s hope to do here.

*OK, we have added a couple of sentences. Proposed additional text:*

*“We use this to assess the variability in recorded eruptions with time and with climate. We discuss how representative the eruption record in Antarctica is, and use sulfur isotope analysis to augment this discussion.”*

Line 93: I think this section should be titled “Existing EDC sulfate data” or something like that, to clearly distinguish from new methods and data that are being used and contributed here in the “methods” section.

*While we understand the point, we don’t think there is any confusion here for a reader who looks at these sections, and the proposed rewording seems rather convoluted. No change proposed.*

Lines 123-127 and Fig. 3: Without additional analyses, interpretation, or discussion, this section and figure don’t add anything to the paper. I would just cite Traversi et al., 2019 and say the sulfate data cannot be confidently interpreted below 200kyr yet.

*It seems to us quite important to explain why we do not use the data below 200 ka. While Traversi et al certainly describe the phenomenon, the examples they show are from deeper than the ones we show in Fig 3 and do not so clearly show why it would be dangerous to include them in an analysis of volcanic signals. We therefore would prefer to leave this section to illustrate the issue to readers, many of whom will be unaware of this phenomenon.*

Line 166: “This width is justified because diffusion more or less keeps pace with thinning at EDC” – the phrase “more or less” is a bit unsatisfying, given the stakes of this calculation. I admire the author’s ability to intuitively make that judgement, but some quantification justifying the decision would be helpful. If the following sensitivity studies do the job, then just say so.

*Our wording was not quite right. We now refer to Fig. 2 as visual evidence, and alter the sentence, with a suggested wording:*

*“This suggests that diffusion approximately keeps pace with thinning at EDC.”*

Lines 187-188: “..across 21 volcanic sulfate events from Dome C between 10.1 and 96.1 ka.” – how and why were these events chosen? Are they representative of sulfate peak size, duration, etc. i.e., what was the sampling strategy and what implications might it have for interpretation (if any)?

*We chose a range of sulfate events, including (a) examples of peaks that were strong in both EDC and in the matched peak at Dome Fuji, (b) examples of peaks that were strong at EDC but not in Dome*

*Fuji, and (c) peaks that were smaller near to the strong peaks. They are not therefore strictly representative, but nonetheless they cover a range of ages and size of peak. We suggest an extra sentence:*

*“These included examples of both larger and smaller volcanic peaks in the EDC core.”*

Line 198: based on comments above, I think this section should more accurately be titled “..on the East Antarctic plateau” or something similar.

*OK, we have inserted “the EDC core” before Antarctica to be completely clear.*

Line 229: “largest recorded eruption in the timeframe that could accommodate the Toba eruption”- I’m not exactly sure what that means – that the event with a flux of 133 mgm<sup>-2</sup> could be Toba but you’re not sure? Can you please clarify the wording and intent.

*We have altered the wording here in response to a comment by the other reviewer and hope this also clarifies our intent for this reviewer.*

Lines 259-260: “There will certainly also be an associated effect on the efficiency of the Brewer Dobson circulation that transports aerosol to the poles through the stratosphere..” This needs more explanation. What is the specific mechanism here, and what raises your suspicion that it might be in play if it is not present in models? Not saying that models should guide your thinking completely, but as written it’s not clear what might be going on.

*As we have said, we are not aware of any studies that have commented on the strength of the Brewer Dobson circulation in relation to precession (the study we cite by Fu et al looks at the LGM, with a similar stage in the precessional cycle to the present). However, if the ITCZ moves, as Singarayer et al find, then this must affect the B-D circulation. It is not that models don’t show it, just that no studies have investigated it as far as we know. No change proposed.*

Line 266: Discussion – I am surprised to get the Discussion section without first seeing the S isotope data presented along with some analysis of error, data characteristics, etc. I think this is an organizational problem of the manuscript which should be corrected, before interpretations and comparisons are made in the Discussion section. Basically, a good portion of this paragraph (lines 267-277) should be in the “methods” section.

*This is indeed a matter of organisation. We saw this study as being primarily about frequencies of recorded eruptions. The use of S isotopes is only introduced here as support for the notion that most eruptions seen in Antarctica are stratospheric, as indicated by the systematic study of the recent past by Gautier. We then felt it would be useful to add our observations of the longer time period, but as they will be discussed in detail in a separate paper (in preparation) it did not seem appropriate to make a separate section for them. Of course we can move a section from the discussion if the editor requires it but we believe this is a matter of taste and prefer to leave as is.*

Lines 267-277: I don’t doubt, based on previous S isotope data and the new data presented here, that most of the sulfate getting to Dome C is stratospheric. But most is not all, and the proportions estimated by the various studies (49 of 64, or 76%, in Gautier; 18 of 21, or 86% here) are different. Is this difference significant? Why or why not? And what implications does that have for interpreting the data solely as a non-regional record (i.e., comments in the introduction)? This is discussed briefly in lines 294-295, but it would help to address it first here I think.

*The differences in proportions most likely relate to the size of peaks considered: as we noted all the largest peaks examined by Gautier were stratospheric. Given the (as pointed out by the reviewer) unsystematic way our examples were chosen we do not feel a more quantitative comparison is justified.*

Lines 319-320: True, but given my comment above I would remove reference to this and leave it for a dedicated study.

*We cannot really see a justification for removing a cautionary note such as this which the reviewer agrees is true.*
